# Supplementary material for: SPOP mutation leads to genomic instability in prostate cancer
Source: eLife. 2015 Sep 16;4:e09207. doi: 10.7554/eLife.09207 (PMC4621745; doi:10.7554/eLife.09207)
Supplement: Figure 2—source data 2. — Provided as excel file. DOI: http://dx.doi.org/10.7554/eLife.09207.011 [file elife09207s002.xlsx]

## Sheet: C6 enriched in F133V
NAME	GS<br> follow link to MSigDB	GS DETAILS	SIZE	ES	NES	NOM p-val	FDR q-val	FWER p-val	RANK AT MAX	LEADING EDGE
BRCA1_DN.V1_UP	BRCA1_DN.V1_UP	Details ...	75	0.690947	4.49393	0.00314795	0.0187051	0.02	445	tags=9%, list=3%, signal=10%
RELA_DN.V1_DN	RELA_DN.V1_DN	Details ...	91	0.665319	4.3978	0.00104384	0.0486258	0.1	394	tags=11%, list=3%, signal=11%
KRAS.BREAST_UP.V1_DN	KRAS.BREAST_UP.V1_DN	Details ...	98	0.422525	2.9317	0.00306748	0.509224	0.808	4075	tags=62%, list=30%, signal=89%
PTEN_DN.V1_UP	PTEN_DN.V1_UP	Details ...	124	0.400172	2.86732	0.00408163	0.382615	0.81	3700	tags=56%, list=28%, signal=76%
ATM_DN.V1_UP	ATM_DN.V1_UP	Details ...	95	0.400835	2.75217	0.0061792	0.306463	0.81	4289	tags=64%, list=32%, signal=94%
KRAS.600.LUNG.BREAST_UP.V1_DN	KRAS.600.LUNG.BREAST_UP.V1_DN	Details ...	185	0.340908	2.59808	0.0100503	0.25788	0.813	4100	tags=54%, list=31%, signal=77%
CTIP_DN.V1_UP	CTIP_DN.V1_UP	Details ...	84	0.391737	2.59118	0.004158	0.221172	0.814	3091	tags=50%, list=23%, signal=65%
BMI1_DN.V1_UP	BMI1_DN.V1_UP	Details ...	117	0.371581	2.55196	0.0163767	0.194226	0.815	4173	tags=54%, list=31%, signal=77%
KRAS.KIDNEY_UP.V1_UP	KRAS.KIDNEY_UP.V1_UP	Details ...	108	0.36153	2.5324	0.00614754	0.173372	0.817	3949	tags=56%, list=29%, signal=78%
KRAS.AMP.LUNG_UP.V1_DN	KRAS.AMP.LUNG_UP.V1_DN	Details ...	93	0.352056	2.36571	0.00621118	0.161468	0.826	2653	tags=42%, list=20%, signal=52%
MEK_UP.V1_UP	MEK_UP.V1_UP	Details ...	158	0.316679	2.32571	0.0130391	0.149083	0.833	5654	tags=68%, list=42%, signal=116%
IL15_UP.V1_DN	IL15_UP.V1_DN	Details ...	110	0.337789	2.32314	0.011236	0.136895	0.834	2242	tags=34%, list=17%, signal=40%
ALK_DN.V1_DN	ALK_DN.V1_DN	Details ...	97	0.339888	2.31957	0.0103842	0.126507	0.835	3276	tags=42%, list=24%, signal=55%
KRAS.LUNG.BREAST_UP.V1_DN	KRAS.LUNG.BREAST_UP.V1_DN	Details ...	93	0.340859	2.31145	0.00518135	0.11774	0.835	4100	tags=54%, list=31%, signal=77%
SNF5_DN.V1_DN	SNF5_DN.V1_DN	Details ...	120	0.316928	2.29534	0.0050813	0.110449	0.835	3983	tags=52%, list=30%, signal=73%
PDGF_UP.V1_DN	PDGF_UP.V1_DN	Details ...	83	0.349379	2.29456	0.00941423	0.103604	0.835	2240	tags=41%, list=17%, signal=49%
IL21_UP.V1_UP	IL21_UP.V1_UP	Details ...	132	0.323492	2.29301	0.0131579	0.0975647	0.835	3944	tags=51%, list=29%, signal=71%
KRAS.PROSTATE_UP.V1_DN	KRAS.PROSTATE_UP.V1_DN	Details ...	88	0.333195	2.23305	0.00824742	0.0943807	0.841	4489	tags=57%, list=33%, signal=85%
LEF1_UP.V1_UP	LEF1_UP.V1_UP	Details ...	146	0.299051	2.2328	0.0101112	0.0894625	0.841	4012	tags=50%, list=30%, signal=71%
CAHOY_NEURONAL	CAHOY_NEURONAL	Details ...	81	0.341235	2.22911	0.00524109	0.0851757	0.842	5901	tags=72%, list=44%, signal=127%
MEL18_DN.V1_UP	MEL18_DN.V1_UP		114	0.318585	2.21236	0.00714286	0.08219	0.843	4173	tags=55%, list=31%, signal=79%
KRAS.LUNG_UP.V1_UP	KRAS.LUNG_UP.V1_UP		82	0.338533	2.20811	0.00420168	0.078623	0.844	3718	tags=50%, list=28%, signal=69%
P53_DN.V1_DN	P53_DN.V1_DN		153	0.291569	2.19322	0.00912779	0.0756945	0.847	3990	tags=50%, list=30%, signal=70%
KRAS.600.LUNG.BREAST_UP.V1_UP	KRAS.600.LUNG.BREAST_UP.V1_UP		174	0.297003	2.17878	0.020202	0.0733569	0.85	3811	tags=48%, list=28%, signal=67%
KRAS.KIDNEY_UP.V1_DN	KRAS.KIDNEY_UP.V1_DN		85	0.321845	2.16745	0.00412797	0.0708318	0.851	2391	tags=32%, list=18%, signal=38%
KRAS.600_UP.V1_DN	KRAS.600_UP.V1_DN		164	0.289	2.14981	0.0160804	0.0690766	0.856	2645	tags=38%, list=20%, signal=47%
ESC_J1_UP_LATE.V1_UP	ESC_J1_UP_LATE.V1_UP		152	0.286675	2.0953	0.0131313	0.0698058	0.873	4289	tags=51%, list=32%, signal=75%
KRAS.300_UP.V1_DN	KRAS.300_UP.V1_DN		84	0.315923	2.06434	0.0093361	0.0697151	0.88	2614	tags=40%, list=19%, signal=50%
MEL18_DN.V1_DN	MEL18_DN.V1_DN		109	0.28851	2.0448	0.00821355	0.0690186	0.886	3554	tags=47%, list=26%, signal=63%
ATF2_S_UP.V1_UP	ATF2_S_UP.V1_UP		129	0.284314	2.02943	0.0152439	0.0684357	0.888	5108	tags=54%, list=38%, signal=87%
ATF2_S_UP.V1_DN	ATF2_S_UP.V1_DN		137	0.27139	2.01752	0.00707786	0.067796	0.895	5480	tags=61%, list=41%, signal=103%
IL21_UP.V1_DN	IL21_UP.V1_DN		106	0.291895	2.0097	0.0132653	0.0665855	0.898	3216	tags=42%, list=24%, signal=54%
PRC2_EZH2_UP.V1_DN	PRC2_EZH2_UP.V1_DN		144	0.273526	2.00069	0.0161943	0.0655599	0.899	3496	tags=42%, list=26%, signal=57%
PRC2_SUZ12_UP.V1_DN	PRC2_SUZ12_UP.V1_DN		126	0.2835	1.97904	0.0192503	0.0662496	0.905	5221	tags=57%, list=39%, signal=93%
PKCA_DN.V1_UP	PKCA_DN.V1_UP		109	0.290525	1.97379	0.0153689	0.0651049	0.906	5089	tags=54%, list=38%, signal=86%
ERB2_UP.V1_UP	ERB2_UP.V1_UP		153	0.264823	1.97072	0.0131579	0.0637112	0.907	7015	tags=73%, list=52%, signal=151%
ESC_V6.5_UP_EARLY.V1_DN	ESC_V6.5_UP_EARLY.V1_DN		142	0.272673	1.9692	0.0111223	0.0620647	0.907	3961	tags=49%, list=29%, signal=69%
E2F3_UP.V1_DN	E2F3_UP.V1_DN		92	0.290364	1.96704	0.00930714	0.060677	0.907	1345	tags=14%, list=10%, signal=16%
MYC_UP.V1_DN	MYC_UP.V1_DN		106	0.28233	1.95848	0.0142276	0.0601279	0.91	5022	tags=49%, list=37%, signal=78%
KRAS.LUNG.BREAST_UP.V1_UP	KRAS.LUNG.BREAST_UP.V1_UP		83	0.302463	1.95588	0.016546	0.0588342	0.91	2987	tags=43%, list=22%, signal=55%
P53_DN.V1_UP	P53_DN.V1_UP		146	0.260612	1.94396	0.0101523	0.0591084	0.919	3820	tags=47%, list=28%, signal=64%
KRAS.600_UP.V1_UP	KRAS.600_UP.V1_UP		191	0.256674	1.93195	0.0211055	0.0594162	0.926	3690	tags=43%, list=27%, signal=58%
RAPA_EARLY_UP.V1_UP	RAPA_EARLY_UP.V1_UP		131	0.262639	1.92861	0.00505051	0.0583602	0.927	5273	tags=56%, list=39%, signal=91%
P53_DN.V2_UP	P53_DN.V2_UP		92	0.284785	1.91326	0.0134021	0.059348	0.936	4567	tags=52%, list=34%, signal=79%
KRAS.300_UP.V1_UP	KRAS.300_UP.V1_UP		98	0.277857	1.90374	0.0123203	0.0590473	0.938	3904	tags=48%, list=29%, signal=67%
RELA_DN.V1_UP	RELA_DN.V1_UP		111	0.266406	1.89468	0.0132653	0.0592255	0.941	2315	tags=32%, list=17%, signal=39%
ESC_V6.5_UP_LATE.V1_UP	ESC_V6.5_UP_LATE.V1_UP		162	0.253195	1.87923	0.0182002	0.0601725	0.946	2772	tags=35%, list=21%, signal=44%
RAF_UP.V1_DN	RAF_UP.V1_DN		162	0.248486	1.86703	0.011022	0.0608323	0.954	6518	tags=67%, list=49%, signal=128%
BMI1_DN_MEL18_DN.V1_UP	BMI1_DN_MEL18_DN.V1_UP		113	0.263578	1.86464	0.0174002	0.0598588	0.954	4173	tags=50%, list=31%, signal=71%
PRC2_EDD_UP.V1_DN	PRC2_EDD_UP.V1_DN		131	0.254641	1.86402	0.0151668	0.0587179	0.954	3658	tags=37%, list=27%, signal=51%
DCA_UP.V1_UP	DCA_UP.V1_UP		112	0.262526	1.85982	0.0101937	0.0581006	0.954	2481	tags=33%, list=18%, signal=40%
ESC_V6.5_UP_EARLY.V1_UP	ESC_V6.5_UP_EARLY.V1_UP		135	0.254926	1.84399	0.0173116	0.0591918	0.961	6346	tags=66%, list=47%, signal=124%
PRC1_BMI_UP.V1_UP	PRC1_BMI_UP.V1_UP		121	0.258411	1.8137	0.0171891	0.0631709	0.969	5416	tags=58%, list=40%, signal=96%
JAK2_DN.V1_UP	JAK2_DN.V1_UP		117	0.253557	1.81073	0.0162933	0.0625567	0.969	6062	tags=61%, list=45%, signal=110%
CAHOY_ASTROCYTIC	CAHOY_ASTROCYTIC		85	0.269388	1.80972	0.0176899	0.0616397	0.969	5294	tags=58%, list=39%, signal=95%
IL2_UP.V1_DN	IL2_UP.V1_DN		120	0.260328	1.80764	0.0222447	0.0609075	0.969	3911	tags=43%, list=29%, signal=61%
SRC_UP.V1_UP	SRC_UP.V1_UP		116	0.262886	1.79459	0.0245902	0.0619243	0.975	3258	tags=38%, list=24%, signal=50%
ATF2_UP.V1_DN	ATF2_UP.V1_DN		140	0.24013	1.79364	0.0130916	0.06097	0.975	5258	tags=55%, list=39%, signal=89%
EIF4E_DN	EIF4E_DN		84	0.269532	1.79153	0.028125	0.0602539	0.977	6886	tags=74%, list=51%, signal=150%
BMI1_DN_MEL18_DN.V1_DN	BMI1_DN_MEL18_DN.V1_DN		106	0.256824	1.77579	0.0225179	0.0622419	0.981	3119	tags=40%, list=23%, signal=51%
KRAS.PROSTATE_UP.V1_UP	KRAS.PROSTATE_UP.V1_UP		87	0.270492	1.77463	0.0246407	0.0614212	0.981	3076	tags=38%, list=23%, signal=49%
PIGF_UP.V1_DN	PIGF_UP.V1_DN		139	0.245601	1.76862	0.0252781	0.0616231	0.981	5915	tags=60%, list=44%, signal=107%
PTEN_DN.V2_UP	PTEN_DN.V2_UP		85	0.261465	1.7679	0.0270552	0.0608672	0.981	4117	tags=46%, list=31%, signal=66%
NOTCH_DN.V1_DN	NOTCH_DN.V1_DN		110	0.251419	1.75404	0.0253807	0.0624764	0.984	6628	tags=65%, list=49%, signal=128%
KRAS.LUNG_UP.V1_DN	KRAS.LUNG_UP.V1_DN		84	0.266856	1.75189	0.026999	0.0620182	0.985	5258	tags=57%, list=39%, signal=93%
PRC1_BMI_UP.V1_DN	PRC1_BMI_UP.V1_DN		115	0.24806	1.74785	0.0193878	0.0619422	0.986	3194	tags=37%, list=24%, signal=49%
WNT_UP.V1_DN	WNT_UP.V1_DN		124	0.249299	1.73946	0.0284553	0.0628056	0.986	3853	tags=44%, list=29%, signal=62%
EGFR_UP.V1_UP	EGFR_UP.V1_UP		149	0.238592	1.73603	0.0283114	0.062556	0.987	7143	tags=71%, list=53%, signal=150%
TGFB_UP.V1_UP	TGFB_UP.V1_UP		153	0.233053	1.70637	0.0202224	0.0677833	0.99	5838	tags=59%, list=43%, signal=104%
PRC2_SUZ12_UP.V1_UP	PRC2_SUZ12_UP.V1_UP		140	0.237534	1.70324	0.0253036	0.0676313	0.991	2051	tags=29%, list=15%, signal=34%
CAMP_UP.V1_DN	CAMP_UP.V1_DN		164	0.22643	1.70097	0.0271084	0.0671672	0.992	6575	tags=65%, list=49%, signal=125%
CAHOY_OLIGODENDROCUTIC	CAHOY_OLIGODENDROCUTIC		80	0.264584	1.69853	0.0280957	0.0667286	0.992	5413	tags=59%, list=40%, signal=98%
ESC_J1_UP_EARLY.V1_UP	ESC_J1_UP_EARLY.V1_UP		136	0.227403	1.6408	0.0356053	0.0816369	0.998	5712	tags=57%, list=43%, signal=99%
PTEN_DN.V1_DN	PTEN_DN.V1_DN		110	0.231166	1.63345	0.0409417	0.0826091	0.999	6246	tags=61%, list=46%, signal=113%
RPS14_DN.V1_UP	RPS14_DN.V1_UP		136	0.223612	1.62854	0.0332661	0.0833136	0.999	3997	tags=42%, list=30%, signal=59%
MEK_UP.V1_DN	MEK_UP.V1_DN		143	0.222663	1.62553	0.0292929	0.0831541	0.999	3952	tags=40%, list=29%, signal=56%
ATM_DN.V1_DN	ATM_DN.V1_DN		92	0.242563	1.62325	0.0455016	0.0828732	0.999	5171	tags=53%, list=38%, signal=86%
P53_DN.V2_DN	P53_DN.V2_DN		111	0.233028	1.61633	0.040858	0.0843547	0.999	4011	tags=42%, list=30%, signal=60%
KRAS.50_UP.V1_DN	KRAS.50_UP.V1_DN		25	0.356216	1.6123	0.0690506	0.0846243	0.999	4172	tags=56%, list=31%, signal=81%
CRX_NRL_DN.V1_DN	CRX_NRL_DN.V1_DN		102	0.236295	1.60708	0.0449438	0.0849931	0.999	6565	tags=65%, list=49%, signal=126%
KRAS.DF.V1_DN	KRAS.DF.V1_DN		140	0.223177	1.6034	0.040568	0.0854363	0.999	7646	tags=73%, list=57%, signal=167%
CYCLIN_D1_UP.V1_UP	CYCLIN_D1_UP.V1_UP		148	0.222561	1.59595	0.0443102	0.0872806	1	5623	tags=55%, list=42%, signal=94%
NOTCH_DN.V1_UP	NOTCH_DN.V1_UP		134	0.219988	1.59112	0.0334347	0.0878056	1	4550	tags=46%, list=34%, signal=69%
KRAS.BREAST_UP.V1_UP	KRAS.BREAST_UP.V1_UP		87	0.248311	1.57799	0.0520833	0.0918046	1	3649	tags=38%, list=27%, signal=52%
E2F3_UP.V1_UP	E2F3_UP.V1_UP		143	0.21818	1.57789	0.0395137	0.0907468	1	4908	tags=50%, list=37%, signal=77%
NRL_DN.V1_UP	NRL_DN.V1_UP		114	0.236588	1.57708	0.0429009	0.0901811	1	6662	tags=66%, list=50%, signal=129%
JNK_DN.V1_DN	JNK_DN.V1_DN		141	0.213053	1.55956	0.0444444	0.0953878	1	5151	tags=51%, list=38%, signal=82%
STK33_SKM_DN	STK33_SKM_DN		197	0.198981	1.55717	0.031031	0.0951735	1	6339	tags=59%, list=47%, signal=111%
CSR_LATE_UP.V1_DN	CSR_LATE_UP.V1_DN		133	0.212318	1.55408	0.041289	0.0954183	1	5435	tags=55%, list=40%, signal=91%
STK33_NOMO_DN	STK33_NOMO_DN		192	0.198493	1.55337	0.0311245	0.0947008	1	6517	tags=61%, list=49%, signal=117%
CRX_NRL_DN.V1_UP	CRX_NRL_DN.V1_UP		117	0.220548	1.54312	0.0526849	0.09772	1	5174	tags=51%, list=39%, signal=83%
VEGF_A_UP.V1_UP	VEGF_A_UP.V1_UP		148	0.214295	1.541	0.0537525	0.0976427	1	7275	tags=68%, list=54%, signal=147%
BRCA1_DN.V1_DN	BRCA1_DN.V1_DN		96	0.227057	1.53192	0.0632124	0.100614	1	1536	tags=16%, list=11%, signal=18%
GCNP_SHH_UP_LATE.V1_DN	GCNP_SHH_UP_LATE.V1_DN		139	0.209623	1.52307	0.0536981	0.103188	1	3059	tags=34%, list=23%, signal=43%
CAHOY_ASTROGLIAL	CAHOY_ASTROGLIAL		79	0.230172	1.51846	0.0657759	0.104288	1	5168	tags=52%, list=38%, signal=84%
WNT_UP.V1_UP	WNT_UP.V1_UP		131	0.210842	1.50533	0.0606061	0.109055	1	6121	tags=59%, list=46%, signal=107%
LEF1_UP.V1_DN	LEF1_UP.V1_DN		138	0.205903	1.50299	0.0435664	0.109048	1	8225	tags=76%, list=61%, signal=194%
RAPA_EARLY_UP.V1_DN	RAPA_EARLY_UP.V1_DN		141	0.203205	1.49989	0.0568528	0.109566	1	6762	tags=65%, list=50%, signal=129%
CYCLIN_D1_KE_.V1_DN	CYCLIN_D1_KE_.V1_DN		136	0.209681	1.48776	0.0557244	0.114228	1	6295	tags=60%, list=47%, signal=111%
TGFB_UP.V1_DN	TGFB_UP.V1_DN		148	0.199545	1.48366	0.0493952	0.115434	1	6773	tags=64%, list=50%, signal=128%
MTOR_UP.V1_DN	MTOR_UP.V1_DN		148	0.203588	1.47609	0.060423	0.117931	1	5712	tags=54%, list=43%, signal=93%
PKCA_DN.V1_DN	PKCA_DN.V1_DN		122	0.212978	1.47579	0.0591837	0.11694	1	6306	tags=59%, list=47%, signal=110%
BCAT.100_UP.V1_UP	BCAT.100_UP.V1_UP		36	0.283915	1.47001	0.0832356	0.119084	1	7226	tags=78%, list=54%, signal=168%
AKT_UP_MTOR_DN.V1_DN	AKT_UP_MTOR_DN.V1_DN		142	0.202015	1.45452	0.0633803	0.126284	1	3933	tags=37%, list=29%, signal=52%
GCNP_SHH_UP_EARLY.V1_DN	GCNP_SHH_UP_EARLY.V1_DN		128	0.200038	1.44727	0.0788675	0.129037	1	6314	tags=59%, list=47%, signal=111%
RAF_UP.V1_UP	RAF_UP.V1_UP		159	0.195408	1.44212	0.0655242	0.130838	1	7017	tags=65%, list=52%, signal=134%
CSR_EARLY_UP.V1_DN	CSR_EARLY_UP.V1_DN		111	0.2067	1.43281	0.0906314	0.134631	1	8414	tags=79%, list=63%, signal=210%
CYCLIN_D1_UP.V1_DN	CYCLIN_D1_UP.V1_DN		145	0.190464	1.40513	0.0797175	0.150705	1	4403	tags=41%, list=33%, signal=60%
CTIP_DN.V1_DN	CTIP_DN.V1_DN		91	0.207906	1.39694	0.103306	0.154586	1	4465	tags=45%, list=33%, signal=67%
AKT_UP.V1_DN	AKT_UP.V1_DN		143	0.192981	1.374	0.0991903	0.169396	1	7399	tags=67%, list=55%, signal=148%
CRX_DN.V1_UP	CRX_DN.V1_UP		112	0.197084	1.37094	0.115542	0.169835	1	5422	tags=49%, list=40%, signal=82%
IL2_UP.V1_UP	IL2_UP.V1_UP		128	0.190867	1.36702	0.0994924	0.171098	1	7718	tags=70%, list=57%, signal=164%
MTOR_UP.V1_UP	MTOR_UP.V1_UP		118	0.193526	1.36496	0.103553	0.171049	1	1559	tags=17%, list=12%, signal=19%
BCAT_BILD_ET_AL_DN	BCAT_BILD_ET_AL_DN		38	0.257433	1.34378	0.136209	0.185719	1	7049	tags=74%, list=52%, signal=155%
EGFR_UP.V1_DN	EGFR_UP.V1_DN		151	0.177392	1.31533	0.124874	0.207046	1	3952	tags=39%, list=29%, signal=55%
PDGF_ERK_DN.V1_UP	PDGF_ERK_DN.V1_UP		123	0.184025	1.31248	0.136735	0.208083	1	6906	tags=63%, list=51%, signal=129%
LTE2_UP.V1_DN	LTE2_UP.V1_DN		146	0.180857	1.31034	0.132056	0.208151	1	3714	tags=36%, list=28%, signal=49%
DCA_UP.V1_DN	DCA_UP.V1_DN		121	0.181251	1.30337	0.142566	0.212463	1	5302	tags=49%, list=39%, signal=80%
NFE2L2.V2	NFE2L2.V2		300	0.157331	1.28527	0.116116	0.226816	1	5460	tags=47%, list=41%, signal=78%
STK33_DN	STK33_DN		206	0.166209	1.27885	0.130522	0.230728	1	3750	tags=36%, list=28%, signal=49%
ATF2_UP.V1_UP	ATF2_UP.V1_UP		125	0.179934	1.27058	0.160569	0.236472	1	3907	tags=38%, list=29%, signal=54%
CRX_DN.V1_DN	CRX_DN.V1_DN		104	0.179251	1.26595	0.183486	0.23902	1	1654	tags=20%, list=12%, signal=23%
E2F1_UP.V1_DN	E2F1_UP.V1_DN		138	0.179067	1.2658	0.157201	0.237245	1	8873	tags=80%, list=66%, signal=232%
SINGH_KRAS_DEPENDENCY_SIGNATURE_	SINGH_KRAS_DEPENDENCY_SIGNATURE_		18	0.293454	1.22568	0.205656	0.276793	1	6335	tags=67%, list=47%, signal=126%
JNK_DN.V1_UP	JNK_DN.V1_UP		131	0.173043	1.21505	0.202224	0.286295	1	6728	tags=60%, list=50%, signal=118%
NRL_DN.V1_DN	NRL_DN.V1_DN		101	0.178716	1.21336	0.226804	0.285832	1	6900	tags=60%, list=51%, signal=123%
STK33_NOMO_UP	STK33_NOMO_UP		205	0.155645	1.21128	0.194779	0.285985	1	6225	tags=54%, list=46%, signal=99%
AKT_UP_MTOR_DN.V1_UP	AKT_UP_MTOR_DN.V1_UP		136	0.16275	1.18683	0.242915	0.311349	1	5911	tags=52%, list=44%, signal=92%
GLI1_UP.V1_DN	GLI1_UP.V1_DN		21	0.272133	1.18115	0.24908	0.315671	1	3126	tags=38%, list=23%, signal=50%
KRAS.AMP.LUNG_UP.V1_UP	KRAS.AMP.LUNG_UP.V1_UP		82	0.179522	1.18012	0.255452	0.314381	1	3718	tags=34%, list=28%, signal=47%
LTE2_UP.V1_UP	LTE2_UP.V1_UP		149	0.161747	1.16431	0.2286	0.330496	1	8943	tags=79%, list=67%, signal=232%
KRAS.DF.V1_UP	KRAS.DF.V1_UP		150	0.155589	1.15998	0.273642	0.333435	1	4098	tags=38%, list=31%, signal=54%
JAK2_DN.V1_DN	JAK2_DN.V1_DN		90	0.173368	1.15697	0.270382	0.334342	1	7371	tags=66%, list=55%, signal=144%
BCAT.100_UP.V1_DN	BCAT.100_UP.V1_DN		29	0.2299	1.12058	0.311916	0.378126	1	6240	tags=62%, list=46%, signal=116%
ALK_DN.V1_UP	ALK_DN.V1_UP		94	0.162136	1.11621	0.301342	0.380914	1	5012	tags=41%, list=37%, signal=66%
HOXA9_DN.V1_UP	HOXA9_DN.V1_UP		140	0.159031	1.1133	0.282412	0.381938	1	8539	tags=74%, list=64%, signal=200%
AKT_UP.V1_UP	AKT_UP.V1_UP		126	0.156643	1.10524	0.293401	0.38974	1	5376	tags=47%, list=40%, signal=77%
KRAS.50_UP.V1_UP	KRAS.50_UP.V1_UP		31	0.214154	1.08897	0.354801	0.408086	1	3259	tags=35%, list=24%, signal=47%
STK33_SKM_UP	STK33_SKM_UP		188	0.141528	1.08245	0.320242	0.414269	1	6377	tags=53%, list=47%, signal=100%
PTEN_DN.V2_DN	PTEN_DN.V2_DN		106	0.15504	1.07782	0.379877	0.417746	1	6615	tags=58%, list=49%, signal=114%
TBK1.DF_UP	TBK1.DF_UP		232	0.133503	1.0775	0.339	0.415175	1	7523	tags=63%, list=56%, signal=142%
STK33_UP	STK33_UP		203	0.143619	1.07307	0.327655	0.41831	1	6256	tags=53%, list=47%, signal=97%
PIGF_UP.V1_UP	PIGF_UP.V1_UP		154	0.143284	1.05786	0.346038	0.436761	1	8415	tags=71%, list=63%, signal=189%
IL15_UP.V1_UP	IL15_UP.V1_UP		129	0.147179	1.04355	0.388211	0.453514	1	6373	tags=53%, list=47%, signal=101%
CORDENONSI_YAP_CONSERVED_SIGNATURE	CORDENONSI_YAP_CONSERVED_SIGNATURE		55	0.168823	0.968237	0.454744	0.560227	1	7328	tags=64%, list=55%, signal=139%
CYCLIN_D1_KE_.V1_UP	CYCLIN_D1_KE_.V1_UP		158	0.129407	0.945693	0.506036	0.590538	1	5813	tags=47%, list=43%, signal=83%
RB_DN.V1_DN	RB_DN.V1_DN		102	0.136676	0.93327	0.511771	0.605037	1	6656	tags=56%, list=50%, signal=110%
PRC2_EDD_UP.V1_UP	PRC2_EDD_UP.V1_UP		160	0.123005	0.917572	0.537688	0.624073	1	9550	tags=79%, list=71%, signal=271%
BCAT_GDS748_DN	BCAT_GDS748_DN		38	0.165977	0.885293	0.568207	0.66742	1	683	tags=11%, list=5%, signal=11%
YAP1_DN	YAP1_DN		30	0.180788	0.875311	0.582367	0.677463	1	6122	tags=57%, list=46%, signal=104%
BMI1_DN.V1_DN	BMI1_DN.V1_DN		103	0.122649	0.841762	0.649897	0.722163	1	6800	tags=56%, list=51%, signal=113%
BCAT_GDS748_UP	BCAT_GDS748_UP		37	0.155688	0.818892	0.643349	0.749453	1	6905	tags=59%, list=51%, signal=122%
MTOR_UP.N4.V1_DN	MTOR_UP.N4.V1_DN		117	0.109764	0.794764	0.686094	0.777887	1	7573	tags=62%, list=56%, signal=140%
BCAT_BILD_ET_AL_UP	BCAT_BILD_ET_AL_UP		37	0.146074	0.792181	0.698504	0.77659	1	10056	tags=86%, list=75%, signal=343%
RB_P130_DN.V1_UP	RB_P130_DN.V1_UP		108	0.107816	0.754077	0.730143	0.820432	1	3278	tags=26%, list=24%, signal=34%
TBK1.DF_DN	TBK1.DF_DN		247	0.0843938	0.686187	0.851852	0.895565	1	8584	tags=67%, list=64%, signal=182%
HOXA9_DN.V1_DN	HOXA9_DN.V1_DN		155	0.0878423	0.643168	0.878392	0.933482	1	9434	tags=74%, list=70%, signal=244%
ERB2_UP.V1_DN	ERB2_UP.V1_DN		156	0.0869353	0.642326	0.868819	0.928284	1	9659	tags=76%, list=72%, signal=266%
PRC2_EZH2_UP.V1_UP	PRC2_EZH2_UP.V1_UP		152	0.0831981	0.624825	0.8833	0.938397	1	10339	tags=81%, list=77%, signal=347%
PDGF_UP.V1_UP	PDGF_UP.V1_UP		127	0.0872982	0.617593	0.877551	0.938122	1	9467	tags=74%, list=70%, signal=248%
SIRNA_EIF4GI_DN	SIRNA_EIF4GI_DN		78	0.0925802	0.601603	0.877211	0.945371	1	9807	tags=77%, list=73%, signal=283%
VEGF_A_UP.V1_DN	VEGF_A_UP.V1_DN		166	0.0814203	0.598963	0.903808	0.941763	1	9050	tags=69%, list=67%, signal=210%
PDGF_ERK_DN.V1_DN	PDGF_ERK_DN.V1_DN		118	0.083746	0.592776	0.89117	0.940526	1	10252	tags=81%, list=76%, signal=341%
SNF5_DN.V1_UP	SNF5_DN.V1_UP		131	0.0778201	0.553391	0.923232	0.962176	1	3050	tags=24%, list=23%, signal=30%
GCNP_SHH_UP_EARLY.V1_UP	GCNP_SHH_UP_EARLY.V1_UP		135	0.07579	0.541979	0.93731	0.963289	1	10216	tags=79%, list=76%, signal=328%
RB_P130_DN.V1_DN	RB_P130_DN.V1_DN		108	0.0754187	0.533826	0.93905	0.962385	1	9353	tags=72%, list=70%, signal=236%
ESC_V6.5_UP_LATE.V1_DN	ESC_V6.5_UP_LATE.V1_DN		143	0.0661101	0.488959	0.967709	0.978735	1	3812	tags=28%, list=28%, signal=39%
MTOR_UP.N4.V1_UP	MTOR_UP.N4.V1_UP		176	0.064298	0.476873	0.961693	0.97797	1	4254	tags=30%, list=32%, signal=43%
RB_P107_DN.V1_UP	RB_P107_DN.V1_UP		114	0.0608787	0.427623	0.983707	0.988438	1	12092	tags=95%, list=90%, signal=941%
SRC_UP.V1_DN	SRC_UP.V1_DN		116	0.056505	0.405704	0.989837	0.988089	1	11214	tags=85%, list=83%, signal=512%

## Sheet: C6 enriched in WT
NAME	GS<br> follow link to MSigDB	GS DETAILS	SIZE	ES	NES	NOM p-val	FDR q-val	FWER p-val	RANK AT MAX	LEADING EDGE
CSR_LATE_UP.V1_UP	CSR_LATE_UP.V1_UP	Details ...	134	-0.166275	-2.91494	0	0	0	6109	tags=70%, list=45%, signal=127%
MYC_UP.V1_UP	MYC_UP.V1_UP	Details ...	140	-0.149331	-2.38905	0	0.000775052	0.001	6299	tags=69%, list=47%, signal=129%
RB_P107_DN.V1_DN	RB_P107_DN.V1_DN	Details ...	105	-0.155877	-2.20494	0	0.00241127	0.003	6991	tags=72%, list=52%, signal=150%
GCNP_SHH_UP_LATE.V1_UP	GCNP_SHH_UP_LATE.V1_UP	Details ...	148	-0.113558	-2.03884	0	0.0069052	0.01	8943	tags=84%, list=67%, signal=248%
CAMP_UP.V1_UP	CAMP_UP.V1_UP	Details ...	163	-0.115797	-1.93097	0	0.011863	0.019	6142	tags=64%, list=46%, signal=117%
RPS14_DN.V1_DN	RPS14_DN.V1_DN	Details ...	151	-0.0940174	-1.43191	0	0.175953	0.305	6998	tags=68%, list=52%, signal=139%
ESC_J1_UP_LATE.V1_DN	ESC_J1_UP_LATE.V1_DN	Details ...	158	-0.0915395	-1.39662	0	0.191713	0.356	3362	tags=41%, list=25%, signal=54%
SIRNA_EIF4GI_UP	SIRNA_EIF4GI_UP	Details ...	69	-0.118572	-1.37286	0.111111	0.191476	0.394	8070	tags=77%, list=60%, signal=191%
CSR_EARLY_UP.V1_UP	CSR_EARLY_UP.V1_UP	Details ...	135	-0.0806349	-1.2616	0.166667	0.299933	0.579	5305	tags=56%, list=39%, signal=92%
EIF4E_UP	EIF4E_UP	Details ...	79	-0.110471	-1.2551	0.136364	0.278606	0.591	3898	tags=47%, list=29%, signal=66%
ESC_J1_UP_EARLY.V1_DN	ESC_J1_UP_EARLY.V1_DN	Details ...	135	-0.0716101	-1.18179	0.2	0.345819	0.697	5793	tags=57%, list=43%, signal=99%
RB_DN.V1_UP	RB_DN.V1_UP	Details ...	110	-0.090286	-1.14375	0.285714	0.367655	0.746	4835	tags=52%, list=36%, signal=80%
E2F1_UP.V1_UP	E2F1_UP.V1_UP	Details ...	162	-0.0681706	-1.08317	0.272727	0.433881	0.83	6234	tags=60%, list=46%, signal=110%
YAP1_UP	YAP1_UP	Details ...	35	-0.129568	-0.965313	0.496	0.60477	0.943	4368	tags=51%, list=33%, signal=76%
TBK1.DN.48HRS_UP	TBK1.DN.48HRS_UP	Details ...	44	-0.101962	-0.883579	0.581633	0.715379	0.977	10771	tags=93%, list=80%, signal=469%
TBK1.DN.48HRS_DN	TBK1.DN.48HRS_DN	Details ...	46	-0.0939296	-0.811679	0.683168	0.789836	0.986	7123	tags=70%, list=53%, signal=148%
GLI1_UP.V1_UP	GLI1_UP.V1_UP	Details ...	23	-0.0967601	-0.574987	0.972376	0.978958	0.997	7575	tags=74%, list=56%, signal=169%
