# Supplementary material for: SPOP mutation leads to genomic instability in prostate cancer
Source: eLife journal article supplement (doi:10.7554/elife.09207), 2015-09-16
Supplement: supp [file elife_poa_e09207_Figure_2_source_data_1.xls]

## Sheet: Sheet1
Cluster	No.	id	Orthologous_human_gene	log2E.WT	log2E.MUT	log2E.MO5	Var
Cluster A	20328	ENSDARG00000085062	NA	-5.74595	-0.00898878	0.162157	11.308
Cluster A	28027	ENSDARG00000095964	CCL23	-2	0.459432	0.485427	2.0378
Cluster A	11045	ENSDARG00000055446	AC010731.4	-3.11548	0.157541	0.2205	3.64089
Cluster A	14932	ENSDARG00000069884	NA	-2.58496	0.180572	0.232661	2.59832
Cluster A	20589	ENSDARG00000085954	NA	-1.58496	1.05889	1	2.27925
Cluster A	25279	ENSDARG00000092247	NA	-3.64386	-0.395929	-0.469485	3.43851
Cluster A	20293	ENSDARG00000084957	NA	-3.32193	-0.621488	-0.616671	2.43514
Cluster A	20580	ENSDARG00000085928	NA	-5.16993	0.25634	0.263034	9.82691
Cluster A	14246	ENSDARG00000068145	NA	-4.20945	0.182864	0.139725	6.36828
Cluster A	27233	ENSDARG00000094905	NA	-4.05889	0.0285692	0	5.53046
Cluster A	27018	ENSDARG00000094601	NA	-1.73697	0.584963	0.830075	2.00685
Cluster A	26979	ENSDARG00000094543	SOD3	-8.31288	-0.0816618	0.749502	25.0951
Cluster A	27377	ENSDARG00000095108	NA	-2.90689	0.678072	1.02554	4.73944
Cluster A	15159	ENSDARG00000070400	CYSLTR1	-6.04601	0.142347	0.871936	14.4477
Cluster A	28372	ENSDARG00000096432	NA	-3.66297	-0.160465	0.263034	4.64339
Cluster A	20376	ENSDARG00000085233	NA	-7.77149	0.00329759	0.865591	22.6317
Cluster A	22933	ENSDARG00000089084	NA	-3.70044	-0.378512	0	4.14529
Cluster A	23377	ENSDARG00000089687	C17orf105	-2.078	0.337035	0.615857	2.1945
Cluster A	23562	ENSDARG00000089929	NA	-4.36457	0.196143	0.594361	7.59162
Cluster A	23769	ENSDARG00000090189	SLC18A3	-2.27684	0.270648	0.47478	2.35046
Cluster A	19532	ENSDARG00000081106	NA	-2.32193	0.321928	0.459432	2.45747
Cluster A	26282	ENSDARG00000093618	NA	-1.80735	1.09954	1.24101	2.96042
Cluster A	15040	ENSDARG00000070121	RHOH	-7.31741	0.0919783	0.601105	19.6435
Cluster A	23280	ENSDARG00000089552	C2orf61	-3.96963	0.0303736	0.289507	5.70123
Cluster A	24102	ENSDARG00000090649	NA	-2.32193	1.37851	1.58496	4.83328
Cluster A	20996	ENSDARG00000086542	NA	-4.39232	-0.691878	-0.469485	4.85522
Cluster A	20651	ENSDARG00000086082	NA	-6.21432	-0.244693	0.12763	12.6659
Cluster A	23937	ENSDARG00000090425	LRRTM2	-2.96591	0.231062	0.428494	3.63027
Cluster A	20299	ENSDARG00000084972	NA	-2.80735	1.19265	0.321928	4.42509
Cluster A	7509	ENSDARG00000038293	CAD	-2.58496	0.222392	-0.584963	2.08884
Cluster A	27513	ENSDARG00000095286	NA	-2.58496	0.874469	-0.0565835	3.20454
Cluster A	20577	ENSDARG00000085923	NA	-2.58496	0.736966	0.304855	3.26216
Cluster A	3077	ENSDARG00000015678	IFI44	-1.80735	1	0.628031	2.32512
Cluster A	24188	ENSDARG00000090757	NA	-2.80735	0.308122	-0.109624	2.85974
Cluster A	27933	ENSDARG00000095856	NA	-1.58496	1.9386	1.41504	3.61493
Cluster A	1784	ENSDARG00000009612	OVGP1	-1.90689	1.04731	0.624491	2.55232
Cluster A	21454	ENSDARG00000087142	NA	-3.80735	1.09954	0.415037	7.06245
Cluster A	11041	ENSDARG00000055437	NA	-2.16993	0.63743	0.125531	2.2354
Cluster A	21177	ENSDARG00000086776	GPR35	-3	1.08746	0.321928	4.72143
Cluster A	20050	ENSDARG00000084048	NA	-1	1.70044	1.23266	2.08266
Cluster A	26205	ENSDARG00000093517	NA	-1	1.80735	1.32193	2.25137
Cluster A	10134	ENSDARG00000052329	CD200	-2.22239	0.716207	0.231326	2.48187
Cluster A	28397	ENSDARG00000096458	NA	-3.64386	0.815575	0.10164	5.7375
Cluster A	23035	ENSDARG00000089214	NA	-2.88264	0.439285	-0.0995357	3.17854
Cluster A	28230	ENSDARG00000096208	NA	-3.45943	-0.459432	-0.943416	2.5941
Cluster A	25323	ENSDARG00000092303	NA	-1.58496	1.73697	1.58496	3.51779
Cluster A	28347	ENSDARG00000096399	NA	-4	0.169925	0	5.56952
Cluster A	8173	ENSDARG00000040497	GIMAP4	-2.16993	1.078	0.906891	3.34085
Cluster A	18548	ENSDARG00000078603	MYO1H	-1.23704	1.27753	1.152	2.00773
Cluster A	3878	ENSDARG00000019207	GBGT1	-2.15528	0.514573	0.351472	2.23975
Cluster A	18404	ENSDARG00000078340	NA	-1.32193	1.37851	1.22239	2.29839
Cluster A	22471	ENSDARG00000088460	RP11-458D21.5	-3.32193	0.765535	0.321928	5.0303
Cluster A	28376	ENSDARG00000096437	NA	-4.58496	0.758445	0.153246	8.56148
Cluster A	23914	ENSDARG00000090392	NA	-3.50635	0.489543	0.183446	4.94592
Cluster A	25417	ENSDARG00000092441	NA	-3.80735	0.514573	0.186413	5.78949
Cluster A	22661	ENSDARG00000088732	NA	-2.5025	0.719892	0.434937	3.18226
Cluster A	20620	ENSDARG00000086028	IGFN1	-2.32193	0.847997	0.530515	3.04761
Cluster A	19958	ENSDARG00000083716	NA	0	3.32193	3	3.35647
Cluster A	26384	ENSDARG00000093754	NA	-1.32193	1.48543	1.22239	2.404
Cluster A	7266	ENSDARG00000037526	NA	-2.37851	0.0544478	1.28293	3.47244
Cluster A	20195	ENSDARG00000084591	NA	-2.72247	-0.796467	0.137504	2.12687
Cluster A	21426	ENSDARG00000087103	NA	-3.87652	-0.108333	1.46279	7.52931
Cluster A	7737	ENSDARG00000039116	NA	-1.73697	0.415037	1.38904	2.55862
Cluster A	27217	ENSDARG00000094885	NA	-1.48543	0.777608	1.80145	2.82886
Cluster A	13962	ENSDARG00000063519	PLEKHB1	-2.80735	-0.485427	0.530515	2.92748
Cluster A	15726	ENSDARG00000071695	NA	-4.79998	-0.0299015	2.07241	12.4005
Cluster A	19959	ENSDARG00000083718	NA	-4.85798	-2.27302	-0.584963	4.63171
Cluster A	24719	ENSDARG00000091469	ECM1	-3.52356	0	2.28951	8.57485
Cluster A	24616	ENSDARG00000091327	NA	-3.77259	-1.5502	-0.0761717	3.46255
Cluster A	26237	ENSDARG00000093556	SLCO1B3	-2.90689	-0.736966	0.688056	3.27715
Cluster A	24525	ENSDARG00000091197	NA	-1.87447	0	1	2.12937
Cluster A	25310	ENSDARG00000092287	NA	-3.64386	-1.12029	0.256775	3.91327
Cluster A	11193	ENSDARG00000055883	DMC1	-4.55459	-1.16227	0.678072	7.0459
Cluster A	22253	ENSDARG00000088166	RBBP6	-1.24793	0.610053	1.61891	2.11477
Cluster A	7890	ENSDARG00000039583	THAP9	-3.09954	-1.26303	-0.169925	2.19171
Cluster A	811	ENSDARG00000004939	MTDH	-2.2678	-0.495543	0.537938	2.01352
Cluster A	13822	ENSDARG00000063111	NA	-2.41504	-0.415037	0.736966	2.54371
Cluster A	20018	ENSDARG00000083928	NA	-4.10852	-0.899071	0.956931	6.56736
Cluster A	19675	ENSDARG00000081988	NA	-2.5615	-0.376148	0.403057	2.36193
Cluster A	19286	ENSDARG00000079945	DFNB59	-2.27302	-0.273018	0.476438	2.0202
Cluster A	27354	ENSDARG00000095076	NA	-5.20945	-1.20945	0.308122	8.12445
Cluster A	12095	ENSDARG00000058557	NA	-2.45943	0.125531	1.09954	3.38283
Cluster A	24455	ENSDARG00000091091	NA	-3.16993	-1.16993	-0.415037	2.02654
Cluster A	20523	ENSDARG00000085751	NA	-5.70044	0.0274807	2.29123	16.9667
Cluster A	8576	ENSDARG00000042008	KLK6	-2	0.584963	1.58496	3.42233
Cluster A	20228	ENSDARG00000084710	NA	-3.11548	-0.241008	0.868755	4.22804
Cluster A	26055	ENSDARG00000093310	NA	-1.9386	0.646363	1.35755	3.00874
Cluster A	24825	ENSDARG00000091607	NA	-3	-0.584963	0.0874628	2.63616
Cluster A	24678	ENSDARG00000091407	NA	-5.20945	-0.0801703	1.35364	11.9066
Cluster A	19690	ENSDARG00000082058	NA	-5.20945	-0.0801703	1.35364	11.9066
Cluster A	22755	ENSDARG00000088849	NA	-5.20945	-0.0801703	1.35364	11.9066
Cluster A	19882	ENSDARG00000083321	NA	-2.59694	0.157952	0.947533	3.46268
Cluster A	22712	ENSDARG00000088797	NA	-3.58496	-0.4975	0.415037	4.39419
Cluster A	24785	ENSDARG00000091556	NA	-2.80735	0.584963	1.58496	5.30004
Cluster A	27005	ENSDARG00000094580	NA	-2.73697	0	0.807355	3.45084
Cluster A	24569	ENSDARG00000091254	GGT1	-2.90689	-0.447459	0.36257	2.89905
Cluster A	6414	ENSDARG00000034330	NA	-3.12928	-0.669851	0.0824622	2.82168
Cluster A	22739	ENSDARG00000088827	AC007731.1	-3.08746	0.121991	1.10833	4.81303
Cluster A	22350	ENSDARG00000088304	SPACA5	-3.66838	-0.135883	0.608232	5.22027
Cluster A	13342	ENSDARG00000061887	NA	-3.32193	0.263034	1.152	5.60971
Cluster A	19649	ENSDARG00000081872	NA	-2.70044	-0.241008	0.365953	2.63666
Cluster A	19885	ENSDARG00000083337	NA	-3.558	-0.0460964	0.7707	5.2897
Cluster A	17180	ENSDARG00000076160	NA	-2.95777	-0.13465	0.529467	3.42865
Cluster A	27403	ENSDARG00000095140	NA	-4.06609	0.0836579	1.05445	7.39712
Cluster A	9365	ENSDARG00000044475	OMP	-3.45943	0	0.482152	4.6227
Cluster A	20885	ENSDARG00000086392	NA	-3.23266	0.0303736	0.540568	4.19083
Cluster A	5982	ENSDARG00000031749	C5AR1	-1.73697	0.584963	0.932886	2.10675
Cluster A	15937	ENSDARG00000073953	TRIM35	-4.52356	-0.436099	0.180572	6.53609
Cluster A	22439	ENSDARG00000088410	NA	-1.90689	0.450661	0.847997	2.21756
Cluster A	14263	ENSDARG00000068181	DPEP1	-1.66297	0.839535	1.29278	2.53406
Cluster A	10541	ENSDARG00000053563	NA	-3.80735	1.58496	2.55695	11.7544
Cluster A	28375	ENSDARG00000096435	NA	-5.07325	-0.300659	0.559427	9.2074
Cluster A	20599	ENSDARG00000085978	NA	-3.45943	0.710493	1.4975	7.09647
Cluster A	27438	ENSDARG00000095186	NA	-2.66297	0.306661	0.863938	3.59471
Cluster A	24812	ENSDARG00000091593	NA	3.40372	0	1.08844	3.02176
Cluster A	28300	ENSDARG00000096315	NA	2.48543	-0.736966	0.31034	2.70194
Cluster A	18147	ENSDARG00000077899	NA	2.45943	-1	0	3.16941
Cluster A	26731	ENSDARG00000094225	NA	2.43296	-1.32193	-0.222392	3.72651
Cluster A	17617	ENSDARG00000076958	NA	4.20945	-0.0824622	1.25481	4.82312
Cluster A	19583	ENSDARG00000081438	NA	2.80735	0	0.847997	2.07324
Cluster A	22786	ENSDARG00000088887	NA	2.32193	-1	0	2.90443
Cluster A	19552	ENSDARG00000081220	NA	4.80735	0	1	6.43444
Cluster A	24739	ENSDARG00000091500	NA	2.87447	-1.58496	-0.624491	5.50863
Cluster A	24514	ENSDARG00000091181	NA	2.87447	-1.58496	-0.624491	5.50863
Cluster A	24253	ENSDARG00000090835	NA	2.87447	-1.58496	-0.624491	5.50863
Cluster A	23635	ENSDARG00000090019	NA	2.87447	-1.58496	-0.624491	5.50863
Cluster A	23182	ENSDARG00000089420	NA	2.87447	-1.58496	-0.624491	5.50863
Cluster A	22470	ENSDARG00000088457	NA	2.87447	-1.58496	-0.624491	5.50863
Cluster A	21994	ENSDARG00000087833	NA	2.87447	-1.58496	-0.624491	5.50863
Cluster A	21467	ENSDARG00000087163	NA	2.87447	-1.58496	-0.624491	5.50863
Cluster A	21386	ENSDARG00000087052	NA	2.87447	-1.58496	-0.624491	5.50863
Cluster A	21038	ENSDARG00000086600	NA	2.87447	-1.58496	-0.624491	5.50863
Cluster A	20865	ENSDARG00000086363	NA	2.87447	-1.58496	-0.624491	5.50863
Cluster A	20578	ENSDARG00000085925	NA	2.87447	-1.58496	-0.624491	5.50863
Cluster A	20576	ENSDARG00000085922	NA	2.87447	-1.58496	-0.624491	5.50863
Cluster A	20536	ENSDARG00000085787	NA	2.87447	-1.58496	-0.624491	5.50863
Cluster A	20518	ENSDARG00000085742	NA	2.87447	-1.58496	-0.624491	5.50863
Cluster A	20500	ENSDARG00000085656	NA	2.87447	-1.58496	-0.624491	5.50863
Cluster A	20493	ENSDARG00000085633	NA	2.87447	-1.58496	-0.624491	5.50863
Cluster A	20484	ENSDARG00000085615	NA	2.87447	-1.58496	-0.624491	5.50863
Cluster A	20479	ENSDARG00000085603	NA	2.87447	-1.58496	-0.624491	5.50863
Cluster A	20467	ENSDARG00000085564	NA	2.87447	-1.58496	-0.624491	5.50863
Cluster A	20465	ENSDARG00000085558	NA	2.87447	-1.58496	-0.624491	5.50863
Cluster A	20441	ENSDARG00000085473	NA	2.87447	-1.58496	-0.624491	5.50863
Cluster A	20439	ENSDARG00000085467	NA	2.87447	-1.58496	-0.624491	5.50863
Cluster A	20438	ENSDARG00000085462	NA	2.87447	-1.58496	-0.624491	5.50863
Cluster A	20430	ENSDARG00000085410	NA	2.87447	-1.58496	-0.624491	5.50863
Cluster A	20387	ENSDARG00000085265	NA	2.87447	-1.58496	-0.624491	5.50863
Cluster A	20375	ENSDARG00000085231	NA	2.87447	-1.58496	-0.624491	5.50863
Cluster A	20343	ENSDARG00000085106	NA	2.87447	-1.58496	-0.624491	5.50863
Cluster A	20338	ENSDARG00000085092	NA	2.87447	-1.58496	-0.624491	5.50863
Cluster A	20334	ENSDARG00000085072	NA	2.87447	-1.58496	-0.624491	5.50863
Cluster A	20333	ENSDARG00000085070	NA	2.87447	-1.58496	-0.624491	5.50863
Cluster A	20288	ENSDARG00000084938	NA	2.87447	-1.58496	-0.624491	5.50863
Cluster A	20287	ENSDARG00000084933	NA	2.87447	-1.58496	-0.624491	5.50863
Cluster A	20284	ENSDARG00000084928	NA	2.87447	-1.58496	-0.624491	5.50863
Cluster A	20276	ENSDARG00000084909	NA	2.87447	-1.58496	-0.624491	5.50863
Cluster A	20275	ENSDARG00000084907	NA	2.87447	-1.58496	-0.624491	5.50863
Cluster A	20235	ENSDARG00000084738	NA	2.87447	-1.58496	-0.624491	5.50863
Cluster A	20208	ENSDARG00000084646	NA	2.87447	-1.58496	-0.624491	5.50863
Cluster A	20206	ENSDARG00000084642	NA	2.87447	-1.58496	-0.624491	5.50863
Cluster A	20155	ENSDARG00000084450	NA	2.87447	-1.58496	-0.624491	5.50863
Cluster A	20153	ENSDARG00000084442	NA	2.87447	-1.58496	-0.624491	5.50863
Cluster A	20125	ENSDARG00000084331	NA	2.87447	-1.58496	-0.624491	5.50863
Cluster A	20113	ENSDARG00000084288	NA	2.87447	-1.58496	-0.624491	5.50863
Cluster A	20107	ENSDARG00000084270	NA	2.87447	-1.58496	-0.624491	5.50863
Cluster A	20102	ENSDARG00000084251	NA	2.87447	-1.58496	-0.624491	5.50863
Cluster A	20101	ENSDARG00000084244	NA	2.87447	-1.58496	-0.624491	5.50863
Cluster A	20094	ENSDARG00000084221	NA	2.87447	-1.58496	-0.624491	5.50863
Cluster A	20078	ENSDARG00000084159	NA	2.87447	-1.58496	-0.624491	5.50863
Cluster A	20067	ENSDARG00000084121	NA	2.87447	-1.58496	-0.624491	5.50863
Cluster A	20045	ENSDARG00000084027	NA	2.87447	-1.58496	-0.624491	5.50863
Cluster A	20036	ENSDARG00000083994	NA	2.87447	-1.58496	-0.624491	5.50863
Cluster A	20002	ENSDARG00000083882	NA	2.87447	-1.58496	-0.624491	5.50863
Cluster A	19992	ENSDARG00000083847	NA	2.87447	-1.58496	-0.624491	5.50863
Cluster A	19957	ENSDARG00000083713	NA	2.87447	-1.58496	-0.624491	5.50863
Cluster A	19956	ENSDARG00000083710	NA	2.87447	-1.58496	-0.624491	5.50863
Cluster A	19939	ENSDARG00000083662	NA	2.87447	-1.58496	-0.624491	5.50863
Cluster A	19947	ENSDARG00000083687	NA	2.87447	-1.58496	-0.624491	5.50863
Cluster A	14106	ENSDARG00000067683	PDE1C	2.95777	0.206451	0.925999	2.03594
Cluster A	22084	ENSDARG00000087952	NA	2.34792	-0.874469	0	2.77688
Cluster A	19547	ENSDARG00000081199	NA	4.24793	0	1	4.93232
Cluster A	25057	ENSDARG00000091936	GBGT1	2.90689	-1	-0.0303736	4.13858
Cluster A	11731	ENSDARG00000057479	HRH2	2.19931	-1.94753	-0.108524	4.31739
Cluster A	24356	ENSDARG00000090968	NA	2.50635	-0.459432	0.855265	2.2084
Cluster A	28255	ENSDARG00000096239	NA	2.32193	-1	0.530515	2.76447
Cluster A	26784	ENSDARG00000094294	NA	2.08746	-2	-0.137504	4.18779
Cluster A	27494	ENSDARG00000095265	NA	2.11548	-1.58496	0.103093	3.43208
Cluster A	15427	ENSDARG00000070932	HCRT	2.61143	-1.16993	0.656046	3.57607
Cluster A	25247	ENSDARG00000092198	NA	5.35755	1.32193	3.35168	4.07161
Cluster A	21528	ENSDARG00000087236	HIST1H4H	2.47805	-0.485427	0.595158	2.24919
Cluster A	26590	ENSDARG00000094033	NA	2.22239	-1.58496	-0.251539	3.73238
Cluster A	11008	ENSDARG00000055332	NA	2.45943	-1	0.192645	3.08807
Cluster A	19607	ENSDARG00000081593	NA	2.26303	-0.736966	0.297681	2.32218
Cluster A	15874	ENSDARG00000073836	NA	3.12928	-1	0.706269	4.30555
Cluster A	22983	ENSDARG00000089147	NA	2.49476	-0.371969	0.817136	2.07443
Cluster A	25662	ENSDARG00000092783	NA	5.01495	0	1.92912	6.39893
Cluster A	27655	ENSDARG00000095481	NA	1.32193	-2	-0.736966	2.81158
Cluster B	14954	ENSDARG00000069941	NA	1.32193	3.16993	0.347923	2.05458
Cluster B	21460	ENSDARG00000087149	NA	1.22239	3.16993	0.106915	2.4032
Cluster B	16718	ENSDARG00000075342	NA	1	2.45943	-1.16993	3.33512
Cluster B	27168	ENSDARG00000094814	NA	2	3.32193	0	2.79712
Cluster B	20515	ENSDARG00000085724	NA	1.58496	3.90689	-1.58496	7.60004
Cluster B	21317	ENSDARG00000086963	NA	1.80735	3	0.137504	2.06745
Cluster B	20191	ENSDARG00000084584	NA	1.51457	4.20387	-2.20436	10.3547
Cluster B	24900	ENSDARG00000091704	NA	0.736966	2.41504	-1.58496	4.03455
Cluster B	24712	ENSDARG00000091461	NA	0.736966	2.41504	-1.58496	4.03455
Cluster B	24701	ENSDARG00000091439	NA	0.736966	2.41504	-1.58496	4.03455
Cluster B	24657	ENSDARG00000091379	NA	0.736966	2.41504	-1.58496	4.03455
Cluster B	24085	ENSDARG00000090626	NA	0.736966	2.41504	-1.58496	4.03455
Cluster B	24021	ENSDARG00000090541	NA	0.736966	2.41504	-1.58496	4.03455
Cluster B	23998	ENSDARG00000090510	NA	0.736966	2.41504	-1.58496	4.03455
Cluster B	23621	ENSDARG00000090000	NA	0.736966	2.41504	-1.58496	4.03455
Cluster B	23204	ENSDARG00000089455	NA	0.736966	2.41504	-1.58496	4.03455
Cluster B	22634	ENSDARG00000088694	NA	0.736966	2.41504	-1.58496	4.03455
Cluster B	21829	ENSDARG00000087617	NA	0.736966	2.41504	-1.58496	4.03455
Cluster B	21781	ENSDARG00000087552	NA	0.736966	2.41504	-1.58496	4.03455
Cluster B	21701	ENSDARG00000087455	NA	0.736966	2.41504	-1.58496	4.03455
Cluster B	21422	ENSDARG00000087097	NA	0.736966	2.41504	-1.58496	4.03455
Cluster B	21385	ENSDARG00000087050	NA	0.736966	2.41504	-1.58496	4.03455
Cluster B	20763	ENSDARG00000086232	NA	0.736966	2.41504	-1.58496	4.03455
Cluster B	21194	ENSDARG00000086796	NA	0.736966	2.41504	-1.58496	4.03455
Cluster B	14442	ENSDARG00000068740	NA	2.45943	3.9542	0.491853	3.01558
Cluster B	26233	ENSDARG00000093551	NA	1.926	3.29278	0.178337	2.43703
Cluster B	3736	ENSDARG00000018530	MAPKAPK2	1	2.67243	-0.628031	2.72342
Cluster B	20268	ENSDARG00000084885	NA	0.263034	1.848	-1.32193	2.51211
Cluster B	19578	ENSDARG00000081398	NA	1.1964	3.1224	-0.978626	4.20977
Cluster B	21550	ENSDARG00000087266	NA	0	1.90689	-2.16993	4.16087
Cluster B	28141	ENSDARG00000096098	NA	0.736966	2.41504	-1.26303	3.39069
Cluster B	10645	ENSDARG00000053943	CCR9	0	1.53605	-1.80735	2.80073
Cluster B	27883	ENSDARG00000095792	NA	2	3.70044	0	3.43079
Cluster B	20123	ENSDARG00000084323	NA	2.58496	3.32193	0.392317	2.32224
Cluster B	11456	ENSDARG00000056654	GNA15	2.16993	2.90689	0	2.28362
Cluster B	25443	ENSDARG00000092476	NA	3.16993	4.08746	0.473931	3.52798
Cluster B	23327	ENSDARG00000089615	NA	2.32193	3.08746	-0.137504	2.83921
Cluster B	4490	ENSDARG00000022139	OCSTAMP	2	2.70044	-0.169925	2.2397
Cluster B	25831	ENSDARG00000093001	NA	3.58496	4.32193	1.32193	2.44407
Cluster B	11498	ENSDARG00000056768	RPRML	2.58496	3.39232	0.584963	2.08884
Cluster B	19845	ENSDARG00000083048	NA	3.16993	4.39232	0.0242475	5.07826
Cluster B	27498	ENSDARG00000095270	NA	2.90689	3.90689	0.115477	3.86113
Cluster B	9818	ENSDARG00000045854	FGF23	2.08746	3	-0.334419	2.96943
Cluster B	24691	ENSDARG00000091424	GPR148	2.58496	3.45943	0.241008	2.76951
Cluster B	10056	ENSDARG00000052064	NA	2.58496	3.58496	0.36257	2.72047
Cluster B	23512	ENSDARG00000089866	NA	1.80735	2.70044	-0.247928	2.28578
Cluster B	19385	ENSDARG00000080319	NA	-0.263034	1.11548	-3.16993	4.78583
Cluster B	20192	ENSDARG00000084585	NA	1.05889	2.08746	-1	2.47157
Cluster B	22070	ENSDARG00000087934	NA	-0.115477	0.91427	-2.05683	2.27611
Cluster B	27098	ENSDARG00000094715	NA	2.58496	3.9542	0.017278	3.99452
Cluster B	21525	ENSDARG00000087232	NA	2	3.45943	-0.584963	4.19485
Cluster B	28098	ENSDARG00000096047	CD163L1	-0.0614005	1	-2	2.31412
Cluster B	9716	ENSDARG00000045589	KCNJ8	2.58496	4.39232	-0.652077	6.53181
Cluster B	22612	ENSDARG00000088667	NA	-0.584963	1.35364	-4.08746	7.60521
Cluster B	21013	ENSDARG00000086563	NA	0.736966	2.41504	-2	4.96658
Cluster B	14378	ENSDARG00000068549	NA	0.584963	2.2854	-2.32193	5.42817
Cluster B	21907	ENSDARG00000087716	NA	3.80735	5.08746	1.58496	3.14087
Cluster B	2150	ENSDARG00000011468	HTR1E	3.03562	3.67807	0.108253	3.62097
Cluster B	10692	ENSDARG00000054127	SLC26A6	2.63227	3.16993	0.303392	2.32162
Cluster B	22918	ENSDARG00000089061	NA	1.58496	2.08746	-0.584963	2.01716
Cluster B	20253	ENSDARG00000084819	NA	3.16993	3.80735	0.563901	2.95295
Cluster B	19510	ENSDARG00000080966	NA	4.24793	5.78136	-1.66297	15.4513
Cluster B	25767	ENSDARG00000092920	NA	3.16993	4	0.0824622	4.26143
Cluster B	12144	ENSDARG00000058682	NA	3.58496	4.52356	-1.80735	11.6731
Cluster B	19763	ENSDARG00000082557	NA	3.16993	3.45943	0.678072	2.33818
Cluster B	20475	ENSDARG00000085592	NA	3.32193	3.67243	0.405256	3.21737
Cluster B	26296	ENSDARG00000093634	NA	3	3.58496	-1.80735	8.75499
Cluster B	14231	ENSDARG00000068110	KCNJ4	1.87447	2.22239	-1	3.12791
Cluster B	22997	ENSDARG00000089166	NA	1.77761	2.14684	-1.27302	3.52302
Cluster B	21846	ENSDARG00000087637	NA	1.77761	2.14684	-1.27302	3.52302
Cluster B	21667	ENSDARG00000087409	NA	1.77761	2.14684	-1.27302	3.52302
Cluster B	21192	ENSDARG00000086794	NA	1.77761	2.14684	-1.27302	3.52302
Cluster B	21429	ENSDARG00000087106	NA	1.77761	2.14684	-1.27302	3.52302
Cluster B	24413	ENSDARG00000091034	NA	2.32193	2.70044	-0.160465	2.41505
Cluster B	14811	ENSDARG00000069593	NA	4.08746	4.58496	0.750022	4.3488
Cluster B	21471	ENSDARG00000087167	NA	3.70044	4.22239	0.182864	4.82726
Cluster B	19625	ENSDARG00000081734	NA	4.45943	5.20945	-0.925999	11.2015
Cluster B	19871	ENSDARG00000083250	NA	1.77761	2.14684	-1.02385	3.00629
Cluster B	22030	ENSDARG00000087881	NA	3.90689	4.32193	0.714042	3.89723
Cluster B	20414	ENSDARG00000085360	NA	2.9386	2.58496	-0.874469	4.4387
Cluster B	19368	ENSDARG00000080238	NA	2	1.73697	-0.788496	2.37048
Cluster B	19892	ENSDARG00000083391	NA	3.80735	3.32193	-1.35755	8.13491
Cluster B	25444	ENSDARG00000092477	NA	3.16993	2.94753	0.0114048	3.10776
Cluster B	17562	ENSDARG00000076853	AREG	4.92481	4.61839	0.942285	4.91136
Cluster B	19322	ENSDARG00000080017	NA	2	1.58496	-3.45943	9.23726
Cluster B	20116	ENSDARG00000084298	NA	1.48543	1.26303	-1.5025	2.77089
Cluster B	20303	ENSDARG00000084981	NA	4.85798	4.45943	-0.584963	9.20506
Cluster B	20319	ENSDARG00000085037	NA	3.32193	3.16993	0.321928	2.8557
Cluster B	15098	ENSDARG00000070274	NA	2.58496	2.42626	-0.383329	2.78829
Cluster B	23906	ENSDARG00000090384	NA	9.00843	8.53916	0.0195804	25.6005
Cluster B	11295	ENSDARG00000056166	NA	3.04669	2.88136	0.318361	2.34001
Cluster B	27258	ENSDARG00000094940	RBBP6	1.58496	1.37851	-1.87447	3.76536
Cluster B	23624	ENSDARG00000090003	NA	1.48543	1.1375	-4.75489	12.2971
Cluster B	8907	ENSDARG00000042968	NA	0.826668	0.647119	-2.32193	3.12686
Cluster B	11367	ENSDARG00000056411	ADIPOQ	4.1375	3.82782	-1.18442	8.92357
Cluster B	23888	ENSDARG00000090358	POGK	2.24793	2.08746	-1.63227	4.81968
Cluster B	24508	ENSDARG00000091171	NA	1.70044	1.58496	-1.08746	2.48793
Cluster B	15860	ENSDARG00000073809	NA	4.48444	4.2362	-2.52459	15.8161
Cluster B	25403	ENSDARG00000092418	NA	1.47393	1.35364	-1.80735	3.4622
Cluster B	10294	ENSDARG00000052772	RETSAT	4.57787	4.40839	-0.0211853	6.8002
Cluster B	14166	ENSDARG00000067847	NA	2.80735	2.70044	-0.0962153	2.71057
Cluster B	20048	ENSDARG00000084038	NA	7.82018	7.63662	0.932233	15.4044
Cluster B	9184	ENSDARG00000043850	NA	2.9542	2.85798	-0.169925	3.15627
Cluster B	8444	ENSDARG00000041462	NA	2.23704	2.14684	-0.463947	2.35328
Cluster B	20444	ENSDARG00000085486	NA	5.80735	5.61471	-0.105297	11.2858
Cluster B	26466	ENSDARG00000093867	NA	3.90689	4.20945	0.874469	3.40154
Cluster B	27909	ENSDARG00000095827	NA	2.51096	2.7866	-0.251539	2.82294
Cluster B	18752	ENSDARG00000078995	TEX11	3.06756	3.31002	0.300973	2.79453
Cluster B	25440	ENSDARG00000092472	NA	3	3.24793	-0.0544478	3.3828
Cluster B	22426	ENSDARG00000088394	NA	4	4.16993	0.211504	5.00845
Cluster B	25810	ENSDARG00000092974	NA	5.3339	5.60486	0.169925	9.37977
Cluster B	20565	ENSDARG00000085886	NA	2.58496	2.70044	0.192645	2.00426
Cluster B	21552	ENSDARG00000087269	NA	2.3505	2.51096	-0.893085	3.68902
Cluster B	11599	ENSDARG00000057037	KCNK12	2.90689	3.08746	-0.131245	3.27049
Cluster B	26323	ENSDARG00000093668	ANKMY2	4.9542	5.24793	0.378512	7.45573
Cluster B	24878	ENSDARG00000091675	NA	1.77761	1.94753	-0.608809	2.04312
Cluster B	24640	ENSDARG00000091360	NA	1.77761	1.94753	-0.608809	2.04312
Cluster B	24629	ENSDARG00000091344	NA	1.77761	1.94753	-0.608809	2.04312
Cluster B	24400	ENSDARG00000091018	NA	1.77761	1.94753	-0.608809	2.04312
Cluster B	24275	ENSDARG00000090862	NA	1.77761	1.94753	-0.608809	2.04312
Cluster B	24224	ENSDARG00000090800	NA	1.77761	1.94753	-0.608809	2.04312
Cluster B	24217	ENSDARG00000090792	NA	1.77761	1.94753	-0.608809	2.04312
Cluster B	24215	ENSDARG00000090790	NA	1.77761	1.94753	-0.608809	2.04312
Cluster B	23808	ENSDARG00000090241	NA	1.77761	1.94753	-0.608809	2.04312
Cluster B	23738	ENSDARG00000090154	NA	1.77761	1.94753	-0.608809	2.04312
Cluster B	23464	ENSDARG00000089807	NA	1.77761	1.94753	-0.608809	2.04312
Cluster B	23344	ENSDARG00000089639	NA	1.77761	1.94753	-0.608809	2.04312
Cluster B	23071	ENSDARG00000089261	NA	1.77761	1.94753	-0.608809	2.04312
Cluster B	23043	ENSDARG00000089222	NA	1.77761	1.94753	-0.608809	2.04312
Cluster B	22405	ENSDARG00000088370	NA	1.77761	1.94753	-0.608809	2.04312
Cluster B	22282	ENSDARG00000088211	NA	1.77761	1.94753	-0.608809	2.04312
Cluster B	22258	ENSDARG00000088175	NA	1.77761	1.94753	-0.608809	2.04312
Cluster B	22099	ENSDARG00000087969	NA	1.77761	1.94753	-0.608809	2.04312
Cluster B	21924	ENSDARG00000087738	NA	1.77761	1.94753	-0.608809	2.04312
Cluster B	21913	ENSDARG00000087723	NA	1.77761	1.94753	-0.608809	2.04312
Cluster B	21782	ENSDARG00000087553	NA	1.77761	1.94753	-0.608809	2.04312
Cluster B	21369	ENSDARG00000087028	NA	1.77761	1.94753	-0.608809	2.04312
Cluster B	21332	ENSDARG00000086981	NA	1.77761	1.94753	-0.608809	2.04312
Cluster B	21152	ENSDARG00000086741	NA	1.77761	1.94753	-0.608809	2.04312
Cluster B	20825	ENSDARG00000086313	NA	1.77761	1.94753	-0.608809	2.04312
Cluster B	20678	ENSDARG00000086119	NA	1.77761	1.94753	-0.608809	2.04312
Cluster B	20803	ENSDARG00000086285	NA	1.77761	1.94753	-0.608809	2.04312
Cluster B	233	ENSDARG00000002311	FABP9	0.841302	1.02975	-1.89308	2.67589
Cluster B	18417	ENSDARG00000078364	EPHX3	2.36257	2.5502	-0.321928	2.58181
Cluster B	23581	ENSDARG00000089949	NA	1.32193	1.58496	-2.24793	4.58402
Cluster B	27737	ENSDARG00000095596	NA	2.76939	2.96683	0.192645	2.39578
Cluster B	19595	ENSDARG00000081517	NA	2.974	2.92057	0.147557	2.61354
Cluster B	23565	ENSDARG00000089932	NA	4.45943	4.39232	0.839535	4.2884
Cluster B	23864	ENSDARG00000090327	NA	4.45943	4.39232	0.839535	4.2884
Cluster B	14621	ENSDARG00000069197	CD22	3.45943	3.41504	0.736966	2.43098
Cluster B	25660	ENSDARG00000092780	NA	2.75002	2.71049	0.122557	2.26709
Cluster B	19533	ENSDARG00000081109	NA	0.163825	0.0970987	-5.18587	9.42223
Cluster B	14284	ENSDARG00000068232	CBLN1	4.04439	4	0.834941	3.38669
Cluster B	21776	ENSDARG00000087547	NA	5.2854	5.20945	-0.338169	10.4011
Cluster B	28105	ENSDARG00000096054	NA	3.32193	3.32193	0.265894	3.11311
Cluster B	27087	ENSDARG00000094698	NA	3.16993	3.16993	0	3.34947
Cluster B	3248	ENSDARG00000016421	CRYGB	2.32193	2.32193	-0.36257	2.40218
Cluster B	25949	ENSDARG00000093163	NA	3	3	-0.169925	3.34947
Cluster B	25262	ENSDARG00000092224	GIMAP8	3.73697	3.71882	0.424498	3.63755
Cluster B	19531	ENSDARG00000081104	NA	3.60602	3.57075	0.139403	3.96547
Cluster B	19869	ENSDARG00000083232	NA	5.12928	5.08746	0.543824	6.94547
Cluster B	25527	ENSDARG00000092598	NA	6.72792	7.03342	-1.9169	25.8224
Cluster B	27364	ENSDARG00000095089	NA	-0.0780025	0	-2.58496	2.16216
Cluster B	28102	ENSDARG00000096051	NA	1.72247	1.80735	-0.932886	2.42784
Cluster B	1111	ENSDARG00000006341	TAS1R3	4.55459	4.64386	0.571542	5.4094
Cluster B	20742	ENSDARG00000086205	NA	2.32193	2.45943	-3.24793	10.6027
Cluster B	21133	ENSDARG00000086714	NA	3.9386	4.02975	0.389042	4.3104
Cluster B	26018	ENSDARG00000093256	NA	4.32193	4.39232	-0.530515	7.96424
Cluster B	20583	ENSDARG00000085933	NA	6.91886	7.02237	0.173767	15.4017
Cluster B	20611	ENSDARG00000086016	GIMAP4	6.69349	6.79442	0.0344884	15.0082
Cluster B	7423	ENSDARG00000038009	NA	3.63763	3.72918	-1.38237	8.55611
Cluster B	24641	ENSDARG00000091361	NA	2.1375	2.20163	-1.20645	3.8002
Cluster B	24571	ENSDARG00000091256	NA	2.24793	0.584963	-0.736966	2.23709
Cluster B	27469	ENSDARG00000095228	NA	5.14975	2.16993	0.172837	6.27289
Cluster B	16488	ENSDARG00000074914	DMPK	6.26679	2	-0.93587	13.1172
Cluster B	24540	ENSDARG00000091217	NA	3.64386	1.70044	0.36257	2.72227
Cluster B	779	ENSDARG00000004803	NA	3.83289	1.58496	0.0053138	3.6998
Cluster B	18842	ENSDARG00000079154	NA	1.89308	0.192645	-1	2.11397
Cluster B	20148	ENSDARG00000084424	NA	5.16993	2	-0.222392	7.34409
Cluster B	18627	ENSDARG00000078753	NA	2.64386	1	-0.921997	3.18527
Cluster B	22804	ENSDARG00000088911	NA	4.12338	2.14684	-0.273018	4.84846
Cluster B	23589	ENSDARG00000089959	NA	3.35755	1.90689	0.0951572	2.67167
Cluster B	24780	ENSDARG00000091549	NA	1.45943	-0.415037	-2.16993	3.29425
Cluster B	27256	ENSDARG00000094937	NA	3.85798	2	0.247928	3.25906
Cluster B	27083	ENSDARG00000094694	NA	3.83289	2.08746	0.281182	3.15397
Cluster B	28245	ENSDARG00000096225	NA	2.66297	1.22239	-0.297681	2.19188
Cluster B	6891	ENSDARG00000036222	NPY	3.20945	2.70044	0.543142	2.00371
Cluster B	19479	ENSDARG00000080791	NA	3.32193	2.80735	0.459432	2.32857
Cluster B	8721	ENSDARG00000042513	ACOT1	2.80735	2.16993	-0.106915	2.34721
Cluster B	27565	ENSDARG00000095354	NA	2.70044	2.08746	-0.111893	2.18702
Cluster B	17166	ENSDARG00000076132	NA	2.58496	2	-0.283793	2.29794
Cluster B	24815	ENSDARG00000091597	NA	3.70044	2.70044	-1.24286	6.83096
Cluster B	23615	ENSDARG00000089993	CD22	2.58496	2.11548	-0.347923	2.48176
Cluster B	19610	ENSDARG00000081618	NA	2.02975	1.58496	-0.954196	2.59151
Cluster B	21050	ENSDARG00000086613	NA	1.73697	1.22239	-1.80735	3.66773
Cluster B	28037	ENSDARG00000095975	NA	3.32193	2.87447	0.256775	2.74128
Cluster B	10119	ENSDARG00000052287	NA	2.5025	2.11548	-1	3.68725
Cluster B	12145	ENSDARG00000058685	URGCP	3.16993	2.80735	0.321928	2.40331
Cluster B	25259	ENSDARG00000092220	NA	1.43296	1.03562	-1.71425	2.93743
Cluster B	27729	ENSDARG00000095585	NA	2.80735	2.45943	-0.0759489	2.47711
Cluster B	3746	ENSDARG00000018587	NA	3.45943	3	-0.304855	4.21717
Cluster B	19338	ENSDARG00000080054	NA	2.60204	2.19265	-0.751321	3.34659
Cluster B	10527	ENSDARG00000053525	ENPP7	2.90689	1.58496	-1.80735	5.91324
Cluster B	20234	ENSDARG00000084732	NA	4.64386	3.45943	0.415037	4.75902
Cluster B	24938	ENSDARG00000091759	HGFAC	2.32193	1.32193	-1.03747	2.97539
Cluster B	26550	ENSDARG00000093981	NA	4	3.16993	1.19265	2.07998
Cluster B	10103	ENSDARG00000052222	RASD1	2.16993	1.32193	-0.736966	2.23469
Cluster B	21388	ENSDARG00000087054	GGTLC1	1.25376	0.387023	-1.76553	2.41681
Cluster B	13921	ENSDARG00000063376	CBLN1	2.80735	2	-0.304855	2.60834
Cluster B	20229	ENSDARG00000084711	NA	2.90689	2.16993	0.152003	2.03409
Cluster B	9916	ENSDARG00000046139	NA	3.90689	3.16993	0.807355	2.622
Cluster B	19904	ENSDARG00000083431	NA	3.24793	2.58496	0.436099	2.16059
Cluster B	26671	ENSDARG00000094146	NA	3.85798	3.08746	0.584963	2.92814
Cluster B	19981	ENSDARG00000083790	NA	4.08746	2.58496	-2	10.0561
Cluster B	10787	ENSDARG00000054509	HESX1	3.58496	2.80735	0.469485	2.62942
Cluster B	23352	ENSDARG00000089647	NA	3.29278	2.48543	0.048363	2.85289
Cluster B	18465	ENSDARG00000078451	GZMH	1.77761	0.652077	-1.58496	2.92967
Cluster B	24415	ENSDARG00000091036	NA	1.58496	0.263034	-2.32193	3.94889
Cluster B	21498	ENSDARG00000087200	NA	2.78427	1.558	-0.824428	3.36707
Cluster B	20483	ENSDARG00000085610	NA	0.906891	-0.192645	-2.32193	2.69468
Cluster B	25624	ENSDARG00000092731	MR1	3.52356	2.32193	0	3.20846
Cluster B	19370	ENSDARG00000080246	NA	4.52356	3.45943	1.18057	2.91686
Cluster B	23378	ENSDARG00000089690	NA	2.52356	1.58496	-0.485427	2.37025
Cluster B	20106	ENSDARG00000084269	NA	4.90689	3.32193	0.921997	4.02519
Cluster B	28052	ENSDARG00000095992	NA	4.67243	2.9542	0.415037	4.5875
Cluster B	25958	ENSDARG00000093178	NA	2.80735	1.58496	-0.584963	2.95177
Cluster B	27322	ENSDARG00000095038	NA	2.58496	1.58496	-0.263034	2.0877
Cluster B	11219	ENSDARG00000055986	GZMH	2.27302	0.736966	-1.80735	4.24708
Cluster B	19389	ENSDARG00000080344	NA	2.20398	1.1594	-0.624567	2.04572
Cluster B	28365	ENSDARG00000096424	NA	3.58496	2	-0.70044	4.69486
Cluster B	18004	ENSDARG00000077645	GPR78	2.80735	1.58496	-0.535037	2.86004
Cluster B	20415	ENSDARG00000085363	NA	3.98489	2.66297	0.37707	3.33153
Cluster B	23681	ENSDARG00000090079	NA	-0.686501	-1.36457	1.72367	2.63432
Cluster B	24950	ENSDARG00000091776	NA	0.423369	-0.295709	2.91697	2.84275
Cluster B	21000	ENSDARG00000086547	NA	-0.836501	-1.47393	1.58496	2.60444
Cluster B	22793	ENSDARG00000088896	NA	-1.28011	-2.08746	1.80735	4.22564
Cluster B	19899	ENSDARG00000083417	NA	-3.61471	-4.61471	0.0941222	6.15476
Cluster B	27039	ENSDARG00000094632	NA	-1.54057	-2.19265	0.906891	2.6704
Cluster B	13780	ENSDARG00000062999	CX3CR1	-0.219313	-1.2854	2.42321	3.64555
Cluster B	24985	ENSDARG00000091828	NA	0.315502	-0.654887	2.72748	3.03329
Cluster B	7400	ENSDARG00000037941	SYT5	-0.652077	-1.45943	1.46123	2.27469
Cluster B	19426	ENSDARG00000080568	NA	0.263034	-0.514573	2.32193	2.14824
Cluster B	7918	ENSDARG00000039687	NA	-3.97728	-5.56224	0.115477	8.58321
Cluster B	23961	ENSDARG00000090453	NA	-0.402437	-1.29373	1.8723	2.66543
Cluster B	19101	ENSDARG00000079615	RBBP6	-0.539448	-1.21215	1.59573	2.14929
Cluster B	25517	ENSDARG00000092582	NA	-1	-1.80735	1.54432	3.05985
Cluster B	12950	ENSDARG00000060846	CABP7	-1.41504	-2.13124	0.733925	2.22337
Cluster B	17240	ENSDARG00000076269	NA	-1.45943	-2.45943	1.58496	4.43758
Cluster B	23750	ENSDARG00000090167	NA	-0.864345	-1.62619	1.22239	2.17488
Cluster B	19017	ENSDARG00000079469	NA	-0.137504	-0.874469	2	2.2291
Cluster B	27446	ENSDARG00000095194	NA	0.165737	-0.541709	2.22239	2.06176
Cluster B	17673	ENSDARG00000077058	CELA1	-1.8625	-2.73697	0.628031	3.04844
Cluster B	25333	ENSDARG00000092317	NA	-0.447459	-1.32193	2	2.96499
Cluster B	26882	ENSDARG00000094418	NA	-2.53605	-3.53605	0.280108	3.91564
Cluster B	20140	ENSDARG00000084398	NA	-3.9386	-4.52356	0.544321	7.68703
Cluster B	26475	ENSDARG00000093878	NA	-1.26303	-1.58496	1.19265	2.30818
Cluster B	19446	ENSDARG00000080661	NA	-5.22239	-5.80735	0	10.2235
Cluster B	23672	ENSDARG00000090066	NA	-0.628031	-0.917538	1.76553	2.16864
Cluster B	15759	ENSDARG00000071864	NA	-3.53051	-3.89308	0.976349	7.35911
Cluster B	25359	ENSDARG00000092356	RBBP6	0.120294	-0.131245	3.11548	3.2626
Cluster B	16491	ENSDARG00000074920	NA	-0.652077	-0.874469	1.73697	2.0961
Cluster B	26709	ENSDARG00000094196	RBBP6	-0.932886	-1.22239	1.90689	2.99009
Cluster B	21079	ENSDARG00000086651	NA	-1.51457	-2	1.55943	3.72577
Cluster B	27288	ENSDARG00000094987	RBBP6	-1.14202	-1.54057	1.45943	2.6544
Cluster B	20026	ENSDARG00000083952	NA	-2.58496	-3.58496	3.45943	14.5264
Cluster B	20454	ENSDARG00000085524	NA	-0.206451	-1	4.37851	8.43
Cluster B	25954	ENSDARG00000093172	NA	-1.48543	-2	1.41504	3.38999
Cluster B	27137	ENSDARG00000094766	CCBL2	-1.58496	-2.02554	0.906891	2.50043
Cluster B	11178	ENSDARG00000055833	NA	-1.32193	-1.90689	1.44294	3.20135
Cluster B	14369	ENSDARG00000068483	NETO1	-2.06413	-2.71621	0.943416	3.81056
Cluster B	17964	ENSDARG00000077571	NA	-0.233079	-0.667917	2.12093	2.25136
Cluster B	22792	ENSDARG00000088895	NA	0.0671142	-0.485427	3	3.50922
Cluster B	27890	ENSDARG00000095801	NA	0.36257	-0.106915	2.83007	2.48915
Cluster B	19954	ENSDARG00000083706	NA	-0.485427	-0.106915	2.31159	2.30262
Cluster B	15312	ENSDARG00000070672	NA	-2.58496	-2	1.58496	5.09707
Cluster B	19139	ENSDARG00000079685	NEK5	-4.18982	-3.60486	-0.101283	4.8889
Cluster B	14535	ENSDARG00000068994	NA	-1.03016	-0.411725	2.61471	3.80448
Cluster B	11426	ENSDARG00000056598	NA	-1.41504	-1	1.28011	2.10583
Cluster B	16242	ENSDARG00000074510	NA	-1.13124	-0.523562	2.80735	4.49614
Cluster B	17904	ENSDARG00000077475	RBBP6	-2	-1	1.90689	4.11897
Cluster B	20383	ENSDARG00000085257	NA	-3.32193	-2.32193	0.678072	4.33333
Cluster B	20629	ENSDARG00000086043	NA	-0.208108	0.577767	2.93074	2.66774
Cluster B	22260	ENSDARG00000088177	NLRP6	-2.73697	-2	0.308122	2.52385
Cluster B	1698	ENSDARG00000009161	NA	-0.485427	0.280108	2.70044	2.76563
Cluster B	9957	ENSDARG00000051791	NA	-1.2854	-0.478047	2.08746	3.10165
Cluster B	21264	ENSDARG00000086889	NA	0	0.756729	3.27302	2.93617
Cluster B	22480	ENSDARG00000088474	NA	-1.51457	-0.415037	3.14296	5.92682
Cluster B	19473	ENSDARG00000080770	NA	-1.90689	-1.32193	1.08746	2.51892
Cluster B	19916	ENSDARG00000083497	NA	-0.584963	0.152003	3.40599	4.50988
Cluster B	17121	ENSDARG00000076056	IYD	-4.51457	-3.23447	2.24793	12.9045
Cluster B	21832	ENSDARG00000087620	NA	-2.58496	-2	0.494765	2.67513
Cluster B	14844	ENSDARG00000069685	KLF10	-1.04307	-0.387023	2.1362	2.81748
Cluster B	20086	ENSDARG00000084187	NA	-3.58496	-2.58496	1.22239	6.43444
Cluster B	16966	ENSDARG00000075791	IFI44L	-1.32193	-0.736966	1.47393	2.17451
Cluster B	20256	ENSDARG00000084833	NA	0	0.956931	4.58496	5.85003
Cluster B	26293	ENSDARG00000093631	NA	-1.28011	-0.387023	3	5.09814
Cluster B	26446	ENSDARG00000093837	TAAR6	-2.5025	-1.76553	0.874469	3.15278
Cluster B	26703	ENSDARG00000094189	NA	-1.45943	-0.652077	2.32193	3.96587
Cluster B	23698	ENSDARG00000090104	RBBP6	-0.736966	-0.736966	2.66297	3.85318
Cluster B	7136	ENSDARG00000037067	DNAJC22	-3.88264	-3.88264	0.416025	6.15952
Cluster B	14628	ENSDARG00000069216	ASTL	-2.05889	-2.05889	0.561879	2.28948
Cluster B	27061	ENSDARG00000094662	NA	-1.70044	-1.70044	1	2.43079
Cluster B	23474	ENSDARG00000089819	NA	-0.280108	-0.280108	3.90689	5.84365
Cluster B	17838	ENSDARG00000077344	RBBP6	-0.476438	-0.476438	2	2.04425
Cluster B	21453	ENSDARG00000087140	NA	-4.08746	-4.08746	0.263034	6.30894
Cluster B	24067	ENSDARG00000090601	NA	-1.41504	-1.41504	1.48543	2.80423
Cluster B	23691	ENSDARG00000090093	NA	-4.16993	-4.16993	1.54057	10.8699
Cluster B	8916	ENSDARG00000042983	NA	-2.22239	-2.22239	2.80735	8.43279
Cluster B	20844	ENSDARG00000086335	NA	-3.58496	-3.58496	-0.906891	2.39069
Cluster B	26804	ENSDARG00000094317	NA	-3	-3	0.530515	4.15484
Cluster B	24113	ENSDARG00000090662	NA	-3.32193	-3.32193	0.963474	6.12156
Cluster B	20236	ENSDARG00000084742	NA	-4.16993	-4.16993	2.45943	14.6495
Cluster B	14746	ENSDARG00000069442	GIMAP8	-1.67807	-1.67807	1	2.39069
Cluster B	19369	ENSDARG00000080241	NA	-6.14975	-6.14975	0.61891	15.2716
Cluster B	14510	ENSDARG00000068944	NA	-0.432959	-0.584963	3.07039	4.27636
Cluster B	22229	ENSDARG00000088139	NA	-0.68226	-0.750972	1.77354	2.06814
Cluster B	16659	ENSDARG00000075240	NA	-1.54057	-1.29956	4.60562	12.1175
Cluster B	28084	ENSDARG00000096030	NA	-3.18057	-3	0.652077	4.67658
Cluster B	9654	ENSDARG00000045424	NA	-1.18556	-1.05063	1.32931	2.00114
Cluster B	22871	ENSDARG00000089001	NA	-2.52356	-2.20163	3.58496	11.8171
Cluster B	25702	ENSDARG00000092835	NA	-0.893085	-0.70044	2.80735	4.33916
Cluster B	21902	ENSDARG00000087708	RBBP6	-2.05889	-1.73697	2.07039	5.27509
Cluster B	25997	ENSDARG00000093231	NA	-0.199309	0.0230836	2.59904	2.41929
Cluster B	20052	ENSDARG00000084056	NA	-2.75489	-2.43296	0.85561	3.99234
Cluster B	25903	ENSDARG00000093105	NA	-3.11548	-2.70044	1.55459	6.68117
Cluster B	20478	ENSDARG00000085600	NA	-0.473931	-0.184425	2.70044	3.08048
Cluster B	24247	ENSDARG00000090828	NA	-0.847997	-0.50696	2.9386	4.38775
Cluster B	21112	ENSDARG00000086688	AC087380.14	-1.54057	-1.19265	1.80735	3.38827
Cluster B	24628	ENSDARG00000091343	NA	-1.12553	-0.777608	2.27302	3.49625
Cluster B	19963	ENSDARG00000083728	NA	-1.1635	-0.63743	3.2854	5.90968
Cluster B	21937	ENSDARG00000087753	NPAS4	-3.24793	-2.24793	4.75489	19.0141
Cluster B	11059	ENSDARG00000055495	NA	-3.08746	-2.08746	0.0931094	2.64516
Cluster B	25319	ENSDARG00000092296	NA	-2.63227	-1.78427	0.189971	2.09696
Cluster B	10825	ENSDARG00000054680	CHRNA9	-3.05627	-2.02385	0.488802	3.32447
Cluster B	25481	ENSDARG00000092527	NA	-0.284453	0.569696	2.73039	2.41458
Cluster B	20890	ENSDARG00000086398	NA	-1.078	-0.247928	2	2.53605
Cluster B	26255	ENSDARG00000093578	NA	-2.96963	-1.96963	0.773229	3.75537
Cluster B	14668	ENSDARG00000069294	RLN3	-2.03953	-0.887525	2.16993	4.73244
Cluster B	20537	ENSDARG00000085790	NA	-4.39232	-3.39232	-0.736966	3.56875
Cluster B	14918	ENSDARG00000069848	NA	-3.32193	-2.32193	0.289507	3.47701
Cluster B	24486	ENSDARG00000091137	RP11-10J21.4	-0.571595	0.249542	2.40309	2.36013
Cluster B	6618	ENSDARG00000035435	NA	-3.31034	-1.86673	0.973528	4.75043
Cluster B	27352	ENSDARG00000095073	NA	-2.43296	-1.23133	1.16993	3.36512
Cluster B	100	ENSDARG00000001572	PRF1	-1.41025	-0.341836	1.70131	2.49964
Cluster B	19498	ENSDARG00000080888	NA	-1.90689	-0.447459	2.39232	4.77958
Cluster B	19335	ENSDARG00000080041	NA	-0.341037	0.796467	3	2.88533
Cluster B	19491	ENSDARG00000080851	NA	-0.341037	0.796467	3	2.88533
Cluster B	1409	ENSDARG00000007715	LGSN	-1.87447	-0.758992	1.24393	2.49673
Cluster B	12174	ENSDARG00000058762	NA	-3.58496	-1.58496	2	8.00729
Cluster B	23940	ENSDARG00000090428	CTRB1	-2.90689	-1.09954	2.13578	6.52705
Cluster B	18847	ENSDARG00000079163	BEST2	-2.77259	-1.45066	0.947533	3.55636
Cluster B	19438	ENSDARG00000080612	NA	-2.27302	-1.27302	0.530515	2.01876
Cluster B	26304	ENSDARG00000093644	NA	-3.32193	-1.73697	1.16993	5.18981
Cluster B	28131	ENSDARG00000096087	NA	-3.32193	-1.73697	1.16993	5.18981
Cluster B	6875	ENSDARG00000036159	TRHR	-1	0	1.87447	2.12937
Cluster B	15430	ENSDARG00000070941	NA	-2.66297	-1.44057	0.847997	3.17644
Cluster B	4813	ENSDARG00000024503	NA	-1.75002	-0.402098	1.58496	2.81457
Cluster B	24664	ENSDARG00000091386	NA	-1.9542	-0.281771	2.20163	4.37254
Cluster B	26222	ENSDARG00000093539	NA	-2.16993	-0.754888	1.34577	3.12921
Cluster B	25309	ENSDARG00000092286	NA	-2.22239	-0.719892	1.65208	3.81588
Cluster B	26451	ENSDARG00000093844	CTRB1	-2.70044	-0.893085	2.12146	5.93413
Cluster B	27768	ENSDARG00000095633	C19orf77	-3.58496	-1.77761	1.26849	6.01687
Cluster B	6683	ENSDARG00000035632	NA	-2.70044	-1.37851	0.765535	3.05957
Cluster B	26746	ENSDARG00000094244	NA	-1.73697	-0.321928	2	3.55977
Cluster B	14667	ENSDARG00000069293	AHSG	-2.9542	-1.04731	1.41504	4.79826
Cluster B	2204	ENSDARG00000011693	TTC36	-2.45943	-1.1375	0.710493	2.53517
Cluster B	23060	ENSDARG00000089246	NA	-3.9542	-2.36923	-0.212994	3.52635
Cluster B	10217	ENSDARG00000052578	NA	-2.42626	-0.519374	1.64386	4.14695
Cluster B	27445	ENSDARG00000095193	TNFRSF14	-2.29639	-0.703018	1.14914	2.97351
Cluster B	23845	ENSDARG00000090298	NA	-2.90689	-0.736966	1.926	5.85946
Cluster B	8729	ENSDARG00000042526	SEBOX	-2.13245	-0.160465	2.16993	4.63831
Cluster B	18153	ENSDARG00000077907	NA	-3.39232	-1.39232	1	4.83594
Cluster B	19999	ENSDARG00000083868	NA	-1	0.906891	2.43296	2.95839
Cluster B	25338	ENSDARG00000092326	NA	-2.58496	-0.777608	0.652077	2.63149
Cluster B	20221	ENSDARG00000084684	NA	-3	0.321928	2.80735	8.48965
Cluster B	20279	ENSDARG00000084919	NA	-3.70782	0.173193	3.08246	11.6057
Cluster B	24736	ENSDARG00000091497	NA	-4.58496	-2	-0.118126	5.02935
Cluster B	27509	ENSDARG00000095281	NA	-1.58496	0.0740006	1.28011	2.06925
Cluster B	19943	ENSDARG00000083675	NA	-2.5025	-0.280108	1.28951	3.63034
Cluster B	20266	ENSDARG00000084875	NA	-3.45943	-1.1375	0.514573	3.98557
Cluster B	20677	ENSDARG00000086117	NA	-2.41504	-0.540568	1.32193	3.49124
Cluster B	22988	ENSDARG00000089153	IL17RA	-1.39232	0.251539	1.87447	2.66801
Cluster B	18650	ENSDARG00000078792	CPXM2	-3.42626	-1.72583	-0.118022	2.73683
Cluster B	25938	ENSDARG00000093145	NA	-2.80735	-1.22239	0.263034	2.35765
Cluster B	20189	ENSDARG00000084580	NA	-2.73697	-0.906891	0.847997	3.21346
Cluster B	27604	ENSDARG00000095407	NA	-2.32193	0.485427	3.20945	7.64962
Cluster B	14650	ENSDARG00000069270	LRRC15	-2.5025	-0.765535	0.83399	2.78462
Cluster B	19952	ENSDARG00000083703	NA	-1.90689	-0.206451	1.32193	2.60878
Cluster B	876	ENSDARG00000005257	GBGT1	-3.39232	-1.22239	0.678072	4.14807
Cluster B	20503	ENSDARG00000085668	NA	-3.32193	0.485427	3.70044	12.3577
Cluster B	3731	ENSDARG00000018506	NA	-1.32193	-2.90689	0.782409	3.42521
Cluster B	19895	ENSDARG00000083403	NA	0.564352	-0.799701	2.42291	2.61668
Cluster B	27320	ENSDARG00000095035	NA	0.63743	-0.584963	2.32193	2.1303
Cluster B	23156	ENSDARG00000089382	RNA45S5	0.449752	-0.825129	2.008	2.01335
Cluster B	20399	ENSDARG00000085304	NA	-0.273018	-1.95109	1.79518	3.52132
Cluster B	24424	ENSDARG00000091047	NA	0.206922	-1.16244	1.90323	2.35849
Cluster B	15075	ENSDARG00000070212	RNA45S5	0.43204	-0.820196	2.04078	2.05689
Cluster B	28199	ENSDARG00000096168	NA	-2	-3.58496	0	3.22734
Cluster B	813	ENSDARG00000004952	RSAD2	-0.652077	-2.87447	1.45943	4.6967
Cluster B	24855	ENSDARG00000091643	MAGEE1	-0.899836	-2.67243	0.852246	3.10586
Cluster B	26831	ENSDARG00000094357	NA	0.430634	-2.52356	3.32193	8.54277
Cluster B	19770	ENSDARG00000082614	NA	0.0888093	-1.27684	1.58496	2.0489
Cluster B	19572	ENSDARG00000081346	NA	-1.73697	-3.32193	0	2.76073
Cluster B	19582	ENSDARG00000081431	NA	0.584963	-1	2.32193	2.76073
Cluster B	23505	ENSDARG00000089859	NA	0.271302	-1.27302	1.82597	2.40094
Cluster B	19144	ENSDARG00000079697	NA	0	-1.848	1.89308	3.49909
Cluster B	19787	ENSDARG00000082734	NA	0.558731	-1.12199	2.29734	2.92323
Cluster B	19504	ENSDARG00000080925	NA	0.318011	-0.864106	2.67699	3.25025
Cluster B	22037	ENSDARG00000087890	NA	0.271555	-0.879635	2.64958	3.23926
Cluster B	8683	ENSDARG00000042370	PTAFR	-0.308122	-1.53051	2.18763	3.59126
Cluster B	27569	ENSDARG00000095359	NA	-2.16993	-3.16993	-0.137504	2.38772
Cluster B	6548	ENSDARG00000035137	EHD2	0.621488	-0.378512	2.94996	2.91675
Cluster B	19735	ENSDARG00000082321	NA	-0.128324	-1.03103	1.84327	2.16061
Cluster B	20174	ENSDARG00000084510	NA	-0.378512	-2.11548	3.45943	8.13774
Cluster B	21508	ENSDARG00000087213	NA	0.0166787	-1.61891	3.62149	7.1886
Cluster B	20187	ENSDARG00000084572	NA	-0.152003	-2.51457	3.32193	8.61911
Cluster B	20325	ENSDARG00000085057	NA	-0.152003	-2.51457	3.32193	8.61911
Cluster B	24868	ENSDARG00000091658	SPTSSB	-1.32193	-3.12928	1.54749	5.56204
Cluster B	19384	ENSDARG00000080317	NA	0.547488	-0.70044	2.50148	2.60461
Cluster B	23604	ENSDARG00000089978	NA	-0.226771	-2.08092	2.63743	5.65072
Cluster B	19739	ENSDARG00000082377	NA	-0.321928	-2.32193	3.05889	7.3972
Cluster B	28293	ENSDARG00000096304	BRCA1	-0.415037	-1.77761	1.9419	3.54108
Cluster B	21057	ENSDARG00000086624	NA	-0.301656	-1.40599	1.71128	2.49814
Cluster B	1939	ENSDARG00000010378	CTRL	-0.347923	-1.48543	1.70044	2.60658
Cluster B	19997	ENSDARG00000083866	NA	-1.66985	-3.12928	0.936806	4.24295
Cluster B	25585	ENSDARG00000092679	NA	0.584963	-0.678072	3	3.49265
Cluster B	23256	ENSDARG00000089521	NA	-0.415037	-1.55943	1.7922	2.90248
Cluster B	26338	ENSDARG00000093689	NA	-2.05889	-3.05889	-0.137504	2.20438
Cluster B	23062	ENSDARG00000089248	NA	-2.1375	-3.45943	0.321928	3.6825
Cluster B	24623	ENSDARG00000091337	NA	0.135352	-0.886343	2.06609	2.24808
Cluster C	25025	ENSDARG00000091892	NA	-0.584963	2.73697	-1.32193	4.67549
Cluster C	9461	ENSDARG00000044797	NA	1	3.75489	0.295456	3.34224
Cluster C	19333	ENSDARG00000080038	NA	1	3.45943	0.387023	2.64404
Cluster C	20218	ENSDARG00000084675	NA	1	4.58496	0.321928	5.24753
Cluster C	20877	ENSDARG00000086380	NA	0	2.80735	-0.36257	3.01019
Cluster C	21819	ENSDARG00000087604	TAAR8	1	4.36923	0.537657	4.37441
Cluster C	15599	ENSDARG00000071397	NA	-1	3	-0.321928	4.5825
Cluster C	20058	ENSDARG00000084089	NA	-1.58496	3.22239	-0.893085	6.75442
Cluster C	26155	ENSDARG00000093451	NA	-3.77259	0.596644	-3.16993	5.60674
Cluster C	19802	ENSDARG00000082824	NA	-1	2.45943	-1.22239	4.26216
Cluster C	24731	ENSDARG00000091486	NA	1	4.08746	0.893085	3.29132
Cluster C	24875	ENSDARG00000091672	NA	0.584963	3.80735	0.479993	3.57769
Cluster C	15915	ENSDARG00000073913	NA	-0.736966	1.88753	-0.485427	2.09702
Cluster C	12290	ENSDARG00000059055	FUT9	-0.415037	2.24793	-0.237039	2.21635
Cluster C	24474	ENSDARG00000091117	NA	0	3.75489	0.280108	4.37529
Cluster C	23269	ENSDARG00000089539	PGBD4	-0.584963	3.22239	-0.557995	4.798
Cluster C	24782	ENSDARG00000091552	NA	1	4.08746	1.1375	3.04227
Cluster C	23958	ENSDARG00000090449	SP100	-2.58496	0.736966	-1.32193	2.81158
Cluster C	22908	ENSDARG00000089048	NA	-2.72247	1.38187	-1.23447	4.31749
Cluster C	23657	ENSDARG00000090051	GPRC5A	-1	3.92283	0.697676	6.253
Cluster C	5474	ENSDARG00000028859	FIGLA	-0.106915	4.01282	0.932537	4.59015
Cluster C	26487	ENSDARG00000093896	NA	-1.22239	2.05063	-0.449803	2.92695
Cluster C	23745	ENSDARG00000090161	NA	-2	1.08746	-1	2.48165
Cluster C	13026	ENSDARG00000061049	RNF182	-1	1.80735	-0.206451	2.0944
Cluster C	6949	ENSDARG00000036433	ERP27	-1.70044	1.34395	-0.788496	2.44122
Cluster C	22667	ENSDARG00000088738	GSG1	0	3.76818	1.10916	3.74997
Cluster C	19643	ENSDARG00000081857	NA	-0.584963	2.41504	1.37851	2.3216
Cluster C	19777	ENSDARG00000082666	NA	-0.415037	2.39232	1.39855	2.02632
Cluster C	20180	ENSDARG00000084534	NA	-4.30378	0.188072	-1.39689	5.18981
Cluster C	9498	ENSDARG00000044935	HPD	-2.80735	0.652077	-0.736966	3.0306
Cluster C	19961	ENSDARG00000083722	NA	-2.58496	0.736966	-0.584963	2.79712
Cluster C	20335	ENSDARG00000085080	NA	-4.64386	1.08406	-1.26303	8.29132
Cluster C	26529	ENSDARG00000093953	NA	-2	1	-0.222392	2.27569
Cluster C	18671	ENSDARG00000078832	NA	-1.37851	1.46949	0.281413	2.04633
Cluster C	19062	ENSDARG00000079540	CACNA2D2	-3.06342	0.0931985	-1.21216	2.51589
Cluster C	2930	ENSDARG00000014967	G6PC	-1.80735	1.65208	0.0995357	3.00238
Cluster C	6261	ENSDARG00000033462	NA	-2.24793	2.39593	0.206451	5.3972
Cluster C	19812	ENSDARG00000082867	NA	-3.75489	0.0524674	-1.71621	3.63006
Cluster C	20231	ENSDARG00000084721	NA	-2	1.32193	-0.415037	2.76073
Cluster C	21154	ENSDARG00000086743	NA	-1.80735	2.05063	0	3.72594
Cluster C	25286	ENSDARG00000092256	NA	0	3.41504	1.60266	2.91929
Cluster C	15063	ENSDARG00000070166	EVA1C	-1.80735	1.44057	-0.192645	2.63729
Cluster C	20517	ENSDARG00000085740	NA	-0.584963	2.5025	0.917538	2.38367
Cluster C	22195	ENSDARG00000088096	NA	1.58496	3.58496	0	3.22734
Cluster C	24813	ENSDARG00000091594	NA	1	2.58496	-0.321928	2.11827
Cluster C	24053	ENSDARG00000090584	NA	1	2.58496	-0.321928	2.11827
Cluster C	23942	ENSDARG00000090430	NA	1	2.58496	-0.321928	2.11827
Cluster C	23873	ENSDARG00000090339	NA	1	2.58496	-0.321928	2.11827
Cluster C	23664	ENSDARG00000090058	NA	1	2.58496	-0.321928	2.11827
Cluster C	23559	ENSDARG00000089926	NA	1	2.58496	-0.321928	2.11827
Cluster C	23399	ENSDARG00000089714	NA	1	2.58496	-0.321928	2.11827
Cluster C	22761	ENSDARG00000088855	NA	1	2.58496	-0.321928	2.11827
Cluster C	22444	ENSDARG00000088416	NA	1	2.58496	-0.321928	2.11827
Cluster C	21166	ENSDARG00000086757	NA	1	2.58496	-0.321928	2.11827
Cluster C	20786	ENSDARG00000086263	NA	1	2.58496	-0.321928	2.11827
Cluster C	20987	ENSDARG00000086533	NA	1	2.58496	-0.321928	2.11827
Cluster C	20341	ENSDARG00000085102	NA	0	2.08746	-1.45943	3.17798
Cluster C	20433	ENSDARG00000085431	NA	1	3.11548	-0.321928	3.00642
Cluster C	20525	ENSDARG00000085756	NA	1	3.58496	0	3.42233
Cluster C	27021	ENSDARG00000094604	NA	-0.263034	1.80735	-1	2.11848
Cluster C	27272	ENSDARG00000094955	NA	1	3.90689	-0.357552	4.74641
Cluster C	23477	ENSDARG00000089823	HIST1H4B	1.22239	-1.32193	1.0217	2.00107
Cluster C	26213	ENSDARG00000093528	NA	0.537028	-6.67243	-0.176878	15.7797
Cluster C	20147	ENSDARG00000084418	NA	0.343954	-3.70044	-0.0356239	4.98868
Cluster C	23193	ENSDARG00000089437	HIST1H4H	1.29546	-1.87447	1	3.06638
Cluster C	19406	ENSDARG00000080484	NA	0.115477	-2.58496	-0.169925	2.20104
Cluster C	21235	ENSDARG00000086852	NA	1	-3.70044	0.459432	6.61515
Cluster C	27484	ENSDARG00000095250	NA	0.415037	-2.58496	0	2.64238
Cluster C	20363	ENSDARG00000085180	NA	-0.241008	-3.70044	-0.678072	3.5489
Cluster C	26482	ENSDARG00000093891	NA	3.55459	-1	2.96347	6.1338
Cluster C	21949	ENSDARG00000087770	NA	0.131245	-4.39232	-0.450661	6.05631
Cluster C	27861	ENSDARG00000095762	NA	1.48543	-2.32193	1	4.29447
Cluster C	19391	ENSDARG00000080355	NA	0.710493	-3.45943	0.469485	5.48046
Cluster C	10595	ENSDARG00000053779	NA	0.678072	-3.32193	0.415037	5.00568
Cluster C	20142	ENSDARG00000084403	NA	1.26303	-3.32193	0.955606	6.56895
Cluster C	21842	ENSDARG00000087632	NA	0.0588937	-4.58496	-0.0644487	7.00261
Cluster C	22274	ENSDARG00000088198	NA	-0.447459	-4.90689	-0.584963	6.43075
Cluster C	25261	ENSDARG00000092223	NA	0.0897967	-4.76818	-0.0703893	7.61582
Cluster C	26728	ENSDARG00000094220	NA	0.101283	-5.78136	-0.096676	11.1601
Cluster C	22111	ENSDARG00000087984	NA	1.1375	-2.32193	1	3.83696
Cluster C	23069	ENSDARG00000089258	NA	0.137504	-2.73697	0	2.62874
Cluster C	4514	ENSDARG00000022319	NA	0.263034	-3.32193	0.392317	4.44405
Cluster C	19694	ENSDARG00000082096	NA	0.103836	-6.06609	0.345996	13.2069
Cluster C	14595	ENSDARG00000069128	IL34	0.219566	-3.56124	0.335719	4.9157
Cluster C	20570	ENSDARG00000085899	NA	-0.16665	-5.78136	-0.0320612	10.7663
Cluster C	26509	ENSDARG00000093928	NA	0.276124	-3.54057	0.363812	4.96984
Cluster C	6166	ENSDARG00000032826	CCR8	0.893085	-1.80735	0.893085	2.43079
Cluster C	10106	ENSDARG00000052240	NA	1.96963	-3.58496	2	10.341
Cluster C	20071	ENSDARG00000084138	NA	0.552541	-2.90689	0.584963	4.02696
Cluster C	19969	ENSDARG00000083739	NA	-0.152003	-3.32193	-0.169925	3.33064
Cluster C	24096	ENSDARG00000090640	NA	0.243926	-2.66297	0.216811	2.79064
Cluster C	19757	ENSDARG00000082506	NA	0.584963	-4.08746	0.500074	7.14738
Cluster C	20012	ENSDARG00000083916	NA	0.192645	-2.80735	0.152003	2.95991
Cluster C	19809	ENSDARG00000082850	NA	-0.584963	-3.16993	0.241008	3.16645
Cluster C	24723	ENSDARG00000091476	NA	0.443607	-2.32193	1.32193	3.61622
Cluster C	22962	ENSDARG00000089121	NA	0.443607	-2.32193	1.32193	3.61622
Cluster C	22702	ENSDARG00000088783	NA	0.443607	-2.32193	1.32193	3.61622
Cluster C	20571	ENSDARG00000085900	NA	0.443607	-2.32193	1.32193	3.61622
Cluster C	20226	ENSDARG00000084702	NA	0.443607	-2.32193	1.32193	3.61622
Cluster C	20564	ENSDARG00000085883	NA	0.443607	-2.32193	1.32193	3.61622
Cluster C	3763	ENSDARG00000018671	NA	0.274622	-3.14684	1.32193	5.46219
Cluster C	20075	ENSDARG00000084149	NA	-0.0506261	-2.85798	0.796467	3.65897
Cluster C	24983	ENSDARG00000091825	NA	1.28868	-1.1745	2.0372	2.82375
Cluster C	19374	ENSDARG00000080271	NA	-0.146841	-2.36923	0.415037	2.16782
Cluster C	26307	ENSDARG00000093648	NA	1.73697	-1.58496	2.58496	4.8571
Cluster C	22552	ENSDARG00000088580	NA	-0.146841	-2.63227	0.505235	2.74108
Cluster C	24059	ENSDARG00000090590	NA	0.351472	-2.05063	0.975338	2.55262
Cluster C	16518	ENSDARG00000074983	NA	0.453718	-4.9386	1.97797	13.2066
Cluster C	20448	ENSDARG00000085497	NA	0.36257	-2.80735	1.26303	4.57122
Cluster C	25299	ENSDARG00000092275	NA	-0.736966	-3.32193	0	3.04339
Cluster C	20370	ENSDARG00000085218	NA	1	-1.58496	1.70044	2.99442
Cluster C	21548	ENSDARG00000087264	NA	0.752072	-1.44057	1.35755	2.1673
Cluster C	20168	ENSDARG00000084492	NA	-0.796467	-3.16993	0.186413	2.97739
Cluster C	23819	ENSDARG00000090258	NA	-0.710493	-3.58496	0.440573	4.29874
Cluster C	23613	ENSDARG00000089989	NA	-0.710493	-3.58496	0.440573	4.29874
Cluster C	22869	ENSDARG00000088998	NA	-0.710493	-3.58496	0.440573	4.29874
Cluster C	22975	ENSDARG00000089137	NA	-0.710493	-3.58496	0.440573	4.29874
Cluster C	19962	ENSDARG00000083727	NA	-0.398549	-2.53605	0.395929	2.29944
Cluster C	23456	ENSDARG00000089796	NA	-0.788496	-3.24793	0.14439	3.07115
Cluster C	25984	ENSDARG00000093210	NA	-0.547488	-2.66297	0.255257	2.27261
Cluster C	20105	ENSDARG00000084261	NA	-0.152003	-2.51457	0.736966	2.82408
Cluster C	21952	ENSDARG00000087774	NA	0.770518	-1.28011	1.54432	2.13021
Cluster C	22639	ENSDARG00000088700	NA	0.736966	-2.58496	1.86394	5.34967
Cluster C	15020	ENSDARG00000070073	NA	-1	-3.32193	-0.160465	2.68184
Cluster C	20336	ENSDARG00000085087	NA	0.0780025	-4.16993	1.58496	8.90576
Cluster C	19855	ENSDARG00000083140	NA	0.332575	-2.43296	1.32193	3.7877
Cluster C	19930	ENSDARG00000083614	NA	0.332575	-2.43296	1.32193	3.7877
Cluster C	20658	ENSDARG00000086089	NA	-0.247928	-3.24793	0.823122	4.45343
Cluster C	27027	ENSDARG00000094610	HIST1H2BI	0.392317	-1.67807	1.13124	2.1208
Cluster C	18225	ENSDARG00000078049	NTF4	0.145747	-2.81179	0.428812	3.22143
Cluster C	28081	ENSDARG00000096027	NA	-0.289507	-3.45943	0	3.68332
Cluster C	20530	ENSDARG00000085774	NA	-0.171766	-6.61471	0.412054	15.2046
Cluster C	26846	ENSDARG00000094378	NA	2.32193	-0.584963	2.58496	3.0946
Cluster C	11922	ENSDARG00000058103	GLRA4	0.347463	-3.41504	0.777608	5.31995
Cluster C	23748	ENSDARG00000090165	NA	0.408806	-3.27302	0.825971	5.08859
Cluster C	20913	ENSDARG00000086426	NA	2.44057	-0.222392	2.72247	2.64051
Cluster C	28082	ENSDARG00000096028	NA	-0.321928	-3.32193	0	3.35647
Cluster C	19829	ENSDARG00000082938	NA	0.116814	-3.56768	0.326228	4.79699
Cluster C	9326	ENSDARG00000044337	OR52N5	0.115477	-3.58496	0.415037	4.96383
Cluster C	19174	ENSDARG00000079746	NA	0.500429	-2.5502	0.736966	3.36128
Cluster C	15131	ENSDARG00000070344	NA	1	-1.80735	1.19265	2.81973
Cluster C	19725	ENSDARG00000082262	NA	0.0634254	-3.47573	0.324064	4.50534
Cluster C	14409	ENSDARG00000068638	NA	-0.163499	-3.22239	0.211504	3.54818
Cluster C	15241	ENSDARG00000070529	TSG101	-0.254101	-3.63048	0.166942	4.33293
Cluster C	23498	ENSDARG00000089851	NA	-0.736966	-3.32193	-0.415037	2.53928
Cluster C	28221	ENSDARG00000096195	NA	0.0506261	-4.80735	0.719892	9.09973
Cluster C	22168	ENSDARG00000088060	NA	-0.176878	-3.11548	0.202817	3.29844
Cluster C	7344	ENSDARG00000037819	NA	-0.321928	-3.12928	0.050405	3.02171
Cluster C	20340	ENSDARG00000085101	NA	0.459432	-3	0.912537	4.58015
Cluster C	16880	ENSDARG00000075634	NA	0.0703893	-2.32193	0.415037	2.22216
Cluster C	20269	ENSDARG00000084891	NA	0.160465	-4.08746	0.788496	7.03571
Cluster C	23618	ENSDARG00000089997	GNGT2	-0.0537713	-4.59202	0.623009	8.0417
Cluster C	22635	ENSDARG00000088695	NA	1.26303	-1.32193	1.69032	2.65637
Cluster C	20158	ENSDARG00000084477	NA	2.24793	-1	2.75489	4.15087
Cluster C	11745	ENSDARG00000057536	NA	-0.263034	-3.58496	0.263034	4.35317
Cluster C	21629	ENSDARG00000087366	NA	0.360176	-3.25873	0.92999	5.1611
Cluster C	20055	ENSDARG00000084076	NA	-1	-5.75489	0.0365259	9.5373
Cluster C	24244	ENSDARG00000090825	NA	-0.146841	-2.9542	0.505235	3.37902
Cluster C	24126	ENSDARG00000090678	NA	-0.146841	-2.9542	0.505235	3.37902
Cluster C	23784	ENSDARG00000090205	NA	-0.146841	-2.9542	0.505235	3.37902
Cluster C	22463	ENSDARG00000088448	NA	-0.146841	-2.9542	0.505235	3.37902
Cluster C	23503	ENSDARG00000089857	NA	-0.146841	-2.9542	0.505235	3.37902
Cluster C	19383	ENSDARG00000080314	NA	-0.146841	-2.63227	0.415037	2.62985
Cluster C	24489	ENSDARG00000091141	NA	0	-2.41504	0.547488	2.48478
Cluster C	20982	ENSDARG00000086528	NA	0	-2.41504	0.547488	2.48478
Cluster C	24220	ENSDARG00000090796	NA	0	-2.41504	0.547488	2.48478
Cluster C	15739	ENSDARG00000071727	NA	0.736966	-1.58496	1.1375	2.1606
Cluster C	16560	ENSDARG00000075055	GGTLC3	0.321928	-2	0.736966	2.17576
Cluster C	22819	ENSDARG00000088930	NA	0.707819	-2.58496	1.33479	4.43333
Cluster C	24100	ENSDARG00000090647	NA	0.310929	-4.71882	1.30933	10.439
Cluster C	10163	ENSDARG00000052400	NA	-0.247928	-3.24793	0.351472	3.71916
Cluster C	23427	ENSDARG00000089759	NA	0.201634	-2.32193	0.707218	2.63328
Cluster C	20326	ENSDARG00000085058	NA	-0.540568	-5	0.387023	8.2945
Cluster C	21421	ENSDARG00000087095	NA	1.10692	-1.70044	1.67807	3.2703
Cluster C	24901	ENSDARG00000091706	NA	0.310929	-4.71882	1.33442	10.4979
Cluster C	19219	ENSDARG00000079829	CX3CR1	0.514573	-2.80735	3.08746	8.73397
Cluster C	20538	ENSDARG00000085799	NA	-1	-4.32193	1.58496	8.7681
Cluster C	22637	ENSDARG00000088697	NA	0.507105	-1.19713	1.78178	2.23386
Cluster C	27389	ENSDARG00000095123	NA	-1.41504	-4.58496	0.932886	7.66797
Cluster C	19528	ENSDARG00000081084	NA	-0.825971	-2.47805	0.643208	2.43835
Cluster C	19592	ENSDARG00000081482	NA	0.523562	-1.41504	2.27886	3.41402
Cluster C	23692	ENSDARG00000090094	NA	-0.305834	-2.16439	1.22475	2.88052
Cluster C	18449	ENSDARG00000078428	NA	0.684498	-1.22239	2.32193	3.1466
Cluster C	22890	ENSDARG00000089030	NA	-0.355095	-2.1375	1.16889	2.73862
Cluster C	27435	ENSDARG00000095182	NA	0.353637	-1.848	1.42775	2.78857
Cluster C	19489	ENSDARG00000080841	NA	0.163006	-2.02788	1.26413	2.8083
Cluster C	21953	ENSDARG00000087775	NA	0.527932	-1.42626	1.50404	2.2264
Cluster C	19644	ENSDARG00000081859	NA	-0.0101242	-7.15987	3.79796	30.9491
Cluster C	24742	ENSDARG00000091504	UNC13A	0.137504	-1.73697	1.12626	2.11489
Cluster C	19788	ENSDARG00000082738	NA	-0.628031	-3.08746	0.736966	3.75638
Cluster C	24090	ENSDARG00000090632	NA	-1.58496	-3.90689	-0.321928	3.30643
Cluster C	28133	ENSDARG00000096089	FAT3	-0.514573	-3.32193	1.41504	5.67391
Cluster C	13217	ENSDARG00000061547	HIST1H4J	-0.70044	-2.70044	0.61891	2.79313
Cluster C	22280	ENSDARG00000088209	NA	-0.11757	-2.14505	1.22449	2.87761
Cluster C	14483	ENSDARG00000068874	PTCHD3	-0.17897	-3.32193	1.92057	6.96166
Cluster C	26165	ENSDARG00000093462	NA	-0.777608	-2.848	0.616671	3.03908
Cluster C	20188	ENSDARG00000084578	NA	1.1375	-1.32193	2.58496	3.90129
Cluster C	15335	ENSDARG00000070714	NA	-0.652077	-2.45943	0.5025	2.22877
Cluster C	15619	ENSDARG00000071446	NA	-0.241008	-3.70044	2	8.24747
Cluster C	6319	ENSDARG00000033824	RNF213	1.60875	-0.201977	2.74921	2.21481
Cluster C	20504	ENSDARG00000085669	NA	-0.160465	-2.44057	1.24101	3.45284
Cluster C	23332	ENSDARG00000089620	NA	0.0681715	-2.04731	1.37851	2.98808
Cluster C	8984	ENSDARG00000043196	ANG	2.74723	-1.22239	1.06711	3.97043
Cluster C	7359	ENSDARG00000037859	IL11	2.08746	-1	0.847997	2.41397
Cluster C	18520	ENSDARG00000078551	NA	1.49476	-2.45943	-0.0569409	3.96924
Cluster C	19514	ENSDARG00000081004	NA	2.32193	-1.58496	0.777608	3.87174
Cluster C	23577	ENSDARG00000089945	NA	4.45943	1	3.30743	3.10317
Cluster C	19918	ENSDARG00000083516	NA	2.58496	-0.584963	1.41504	2.56952
Cluster C	21880	ENSDARG00000087680	NA	1.73697	-1.58496	0.509014	2.8213
Cluster C	19579	ENSDARG00000081399	NA	2.07039	-0.736966	1	2.00734
Cluster C	20831	ENSDARG00000086322	NA	1.58496	-2	0.206451	3.27011
Cluster C	27304	ENSDARG00000095015	NA	1.16993	-2	0.295456	2.68037
Cluster C	10242	ENSDARG00000052643	GPT2	0.748461	-2.64386	-0.152003	3.088
Cluster C	15104	ENSDARG00000070285	HIST1H4E	1.58496	-3.32193	0.266515	6.4488
Cluster C	24500	ENSDARG00000091159	NA	4.08746	0	2.90689	4.42519
Cluster C	26168	ENSDARG00000093466	NA	0.662965	-2.58496	-0.321928	2.7734
Cluster C	24037	ENSDARG00000090563	NA	0.222392	-2.58496	-0.321928	2.21648
Cluster C	22285	ENSDARG00000088215	NA	0	-3.90689	-0.716207	4.3262
Cluster C	25727	ENSDARG00000092869	NA	-0.160465	-3.24793	-0.716207	2.70848
Cluster C	23086	ENSDARG00000089285	NA	1.72583	-2.70044	0.736966	5.39757
Cluster C	11628	ENSDARG00000057111	NA	0.271246	-3.48938	-0.674438	3.82676
Cluster C	20528	ENSDARG00000085769	NA	1.8413	-2.58496	0.736966	5.30776
Cluster C	21642	ENSDARG00000087381	TCF23	1.36257	-1.80735	0.584963	2.72938
Cluster C	27996	ENSDARG00000095926	NA	1.37851	-2.32193	0.485427	3.72868
