# Supplementary material for: SPOP mutation leads to genomic instability in prostate cancer
Source: eLife. 2015 Sep 16;4:e09207. doi: 10.7554/eLife.09207 (PMC4621745; doi:10.7554/eLife.09207)
Supplement: Supplementary file 1. — Sequences of antisense-morpholino's targeting Spop as well as primers used in this study. DOI: http://dx.doi.org/10.7554/eLife.09207.024 [file elife09207s003.xlsx]

## Sheet: Sheet1
Morpholinos
Name	Sequence
MO5	CCACTTTGATCTGGACAAACACAC
MO7	CACCTGTTCAAAACAAAGAGCCTCA
Primer for SPOP splice Isoforms
Name	Sequence
zSPOP F1	CCTCCTGCAGAAATGACCAG
zSPOP R5	TTGTCAGCAGCAGCAAGC
Primer for targeted QPCR validation of RNAseq
Name	Forward Primer	Reverse Primer
mdm2	AGAACGCAGGAAGAGGCATA	GGACTCCACCTCAAACTCCA
tp53	TTGTCCCATATGAAGCACCA	ACACACACGCACCTCAAAAG
ccng1	GCTCAACTGGAAGGTCAAGG	CAGGGCCAGAAGAGACAAAG
foxo3b	GGCGAAGCGGGCACCTACAG	GCGGCGTCTCGGTCATCAGC
