# Supplementary figures and images for: SPOP mutation leads to genomic instability in prostate cancer
Source: eLife journal article supplement (doi:10.7554/elife.09207), 2015-09-16

### Intrachromosomal RR

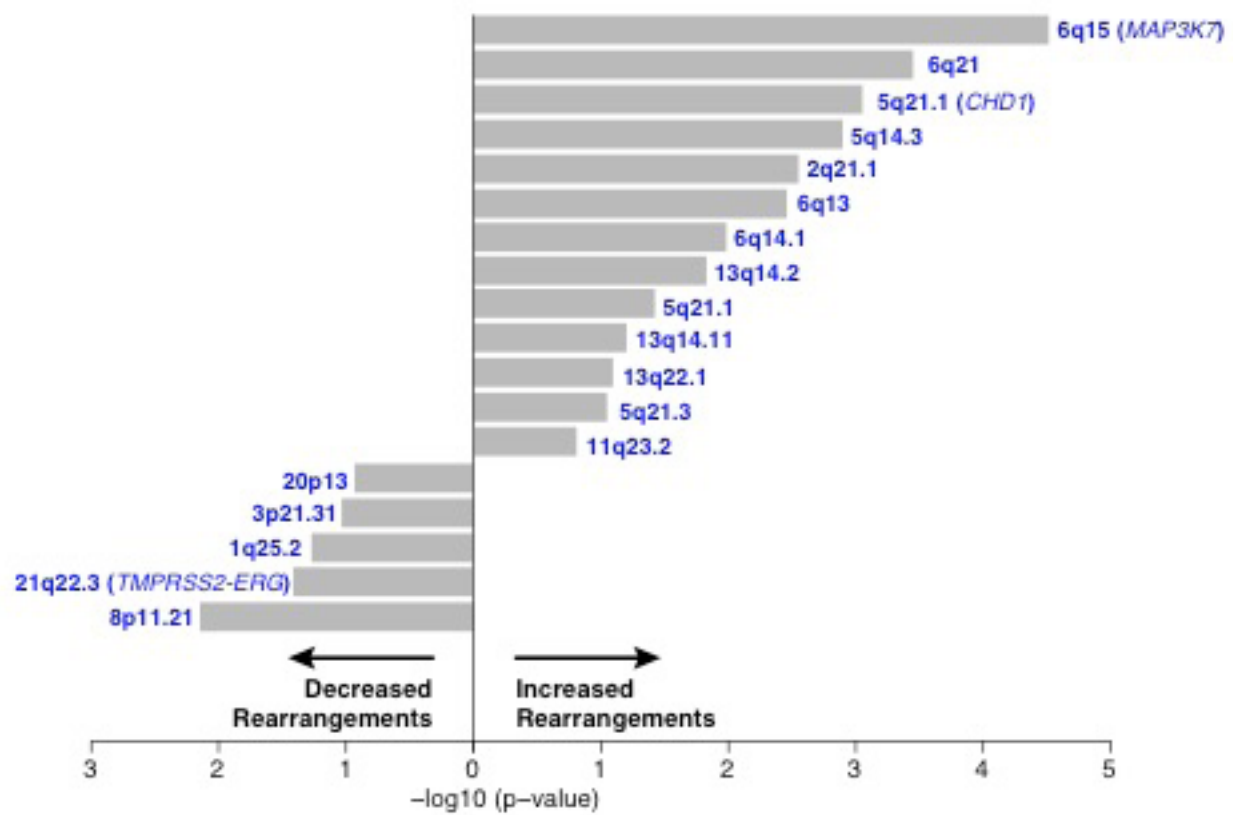

Supplement: supp [file elife_poa_e09207_Figure_1_figure_supplement_1.pdf › elife_poa_e09207_Figure_1_figure_supplement_1.pdf]

Interchromosomal RR

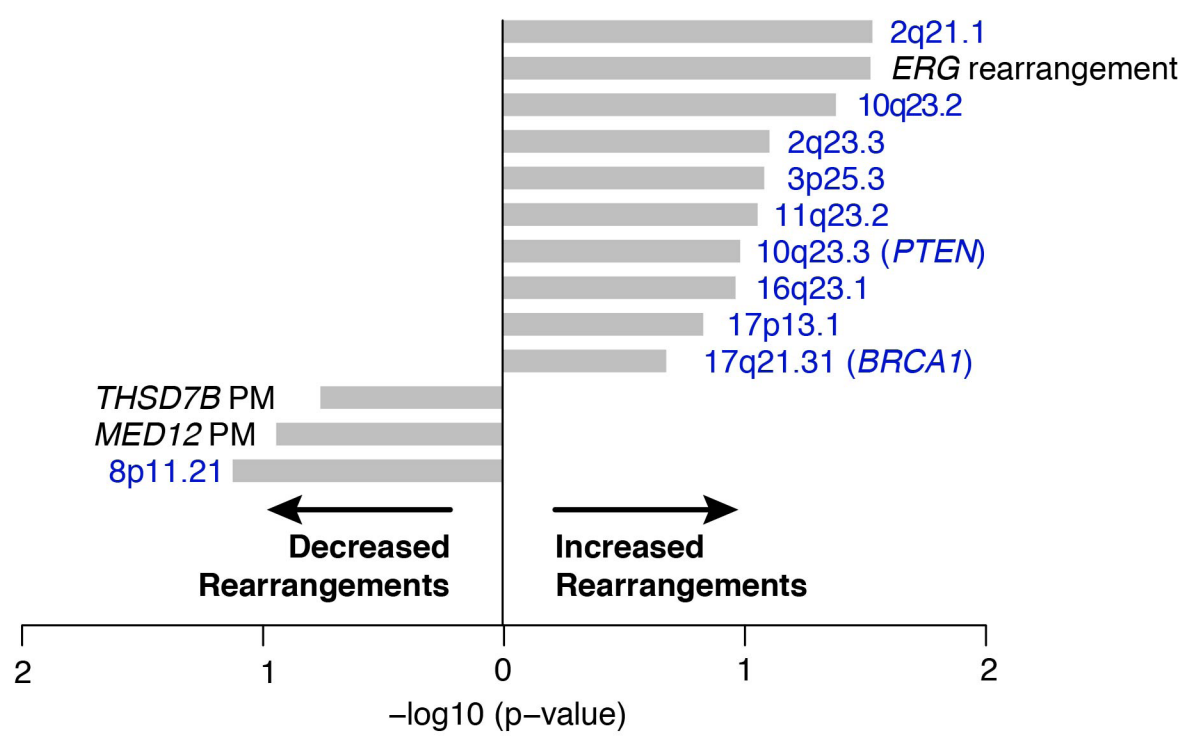

Supplement: supp [file elife_poa_e09207_Figure_1_figure_supplement_2.pdf › elife_poa_e09207_Figure_1_figure_supplement_2.pdf]

SPOP  
mutation

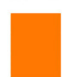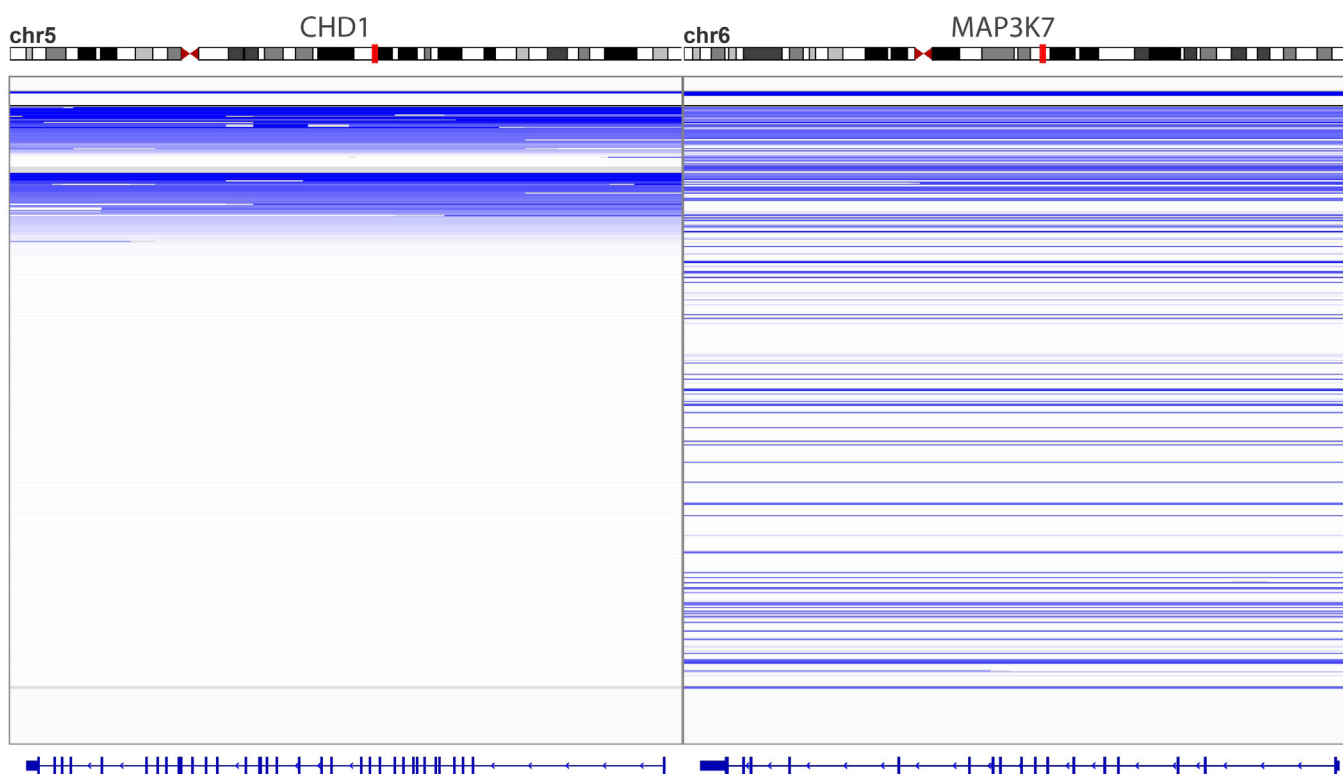

Supplement: supp [file elife_poa_e09207_Figure_1_figure_supplement_3.pdf › elife_poa_e09207_Figure_1_figure_supplement_3.pdf]

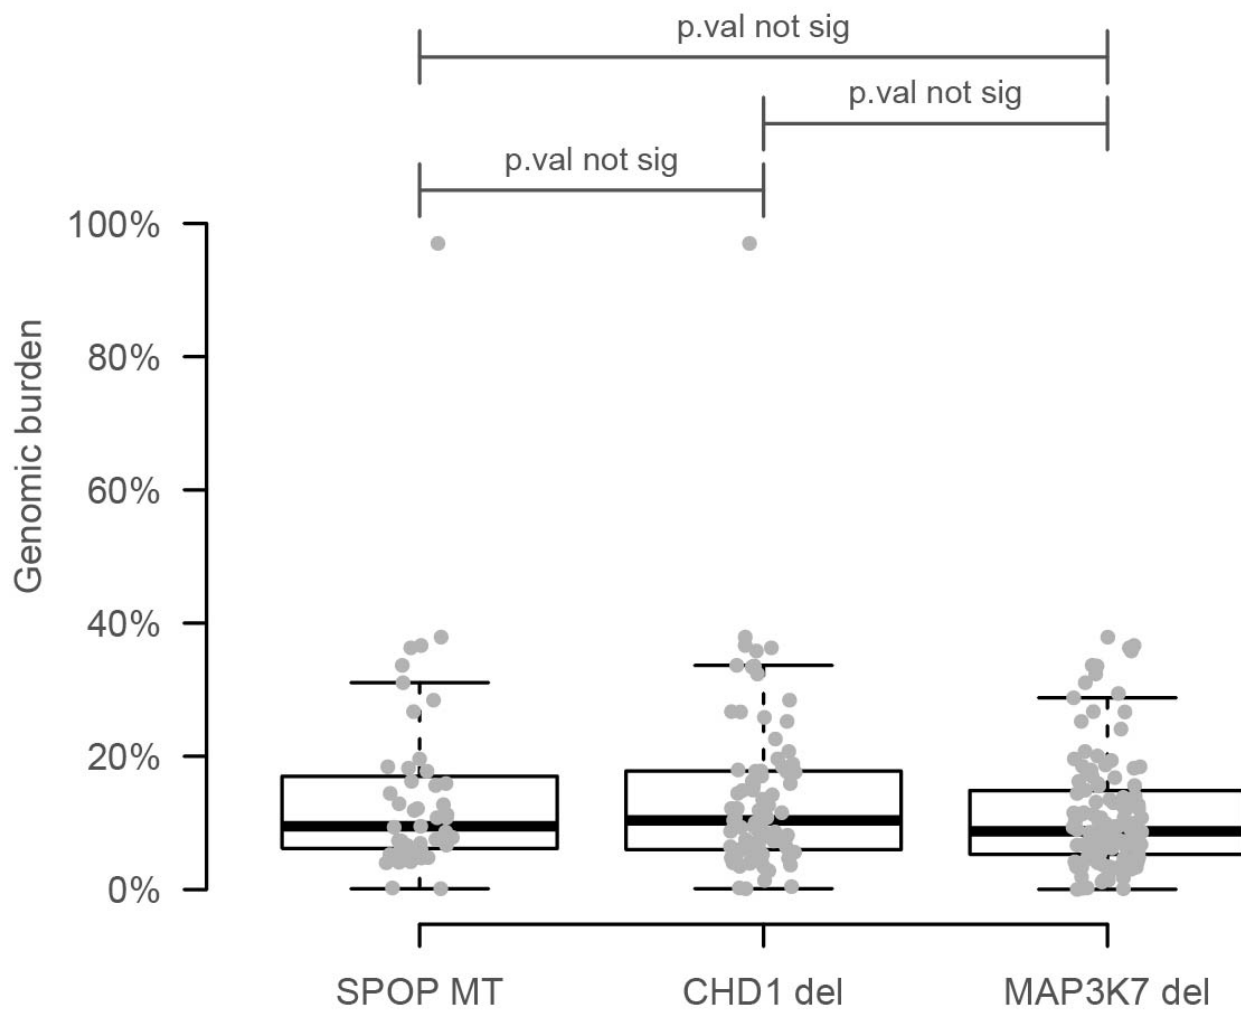

Supplement: supp [file elife_poa_e09207_Figure_1_figure_supplement_4.pdf › elife_poa_e09207_Figure_1_figure_supplement_4.pdf]

Dependency graph based  
on 3 lesions co-occurencies

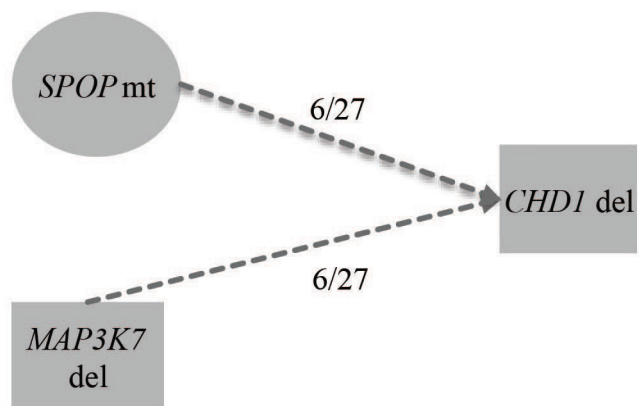

Supplement: supp [file elife_poa_e09207_Figure_1_figure_supplement_5.pdf › elife_poa_e09207_Figure_1_figure_supplement_5.pdf]

Supplementary Figure S3

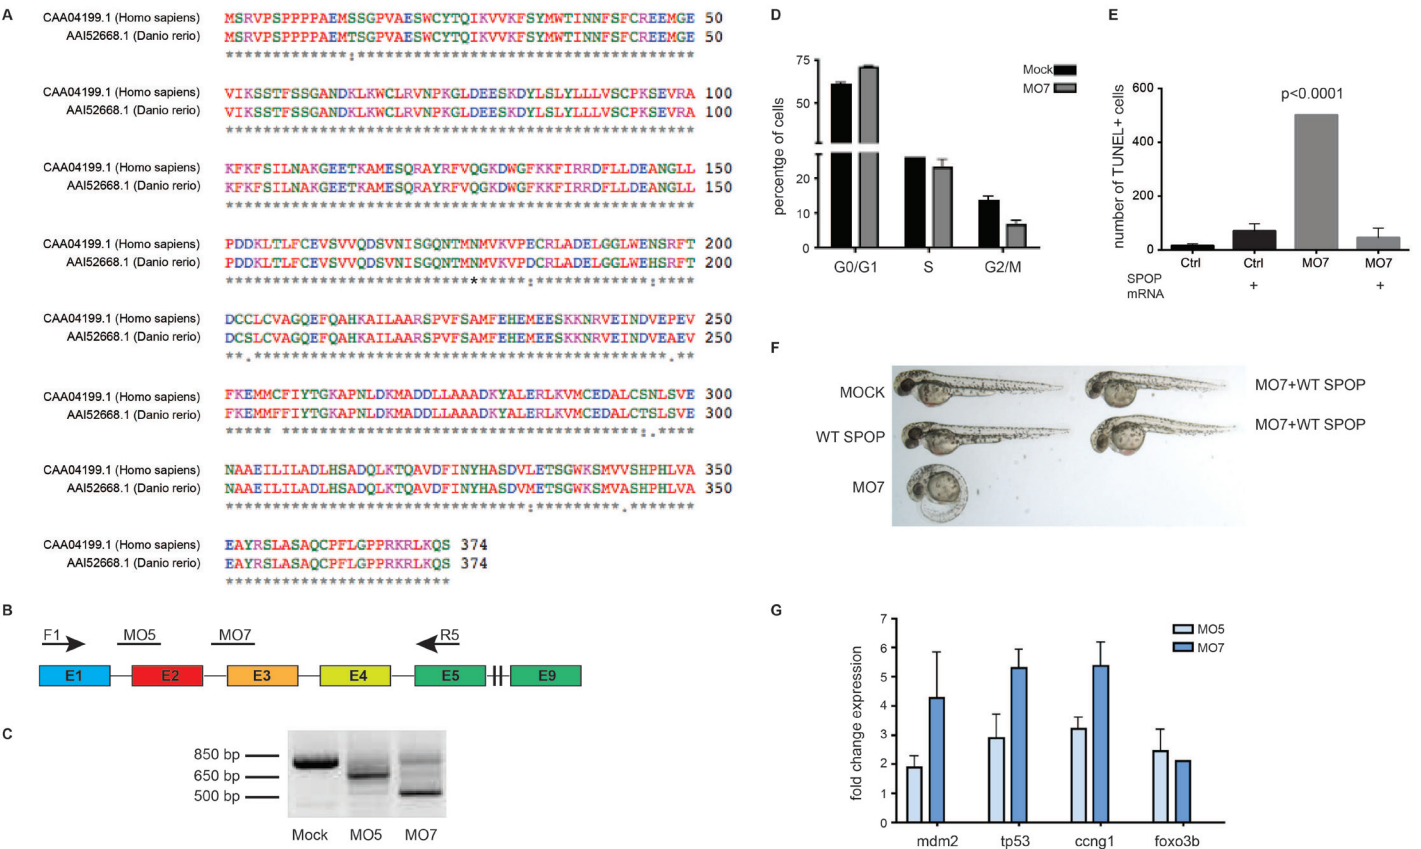

Supplement: supp [file elife_poa_e09207_Figure_2_figure_supplement_1.pdf › elife_poa_e09207_Figure_2_figure_supplement_1.pdf]

Figure S4

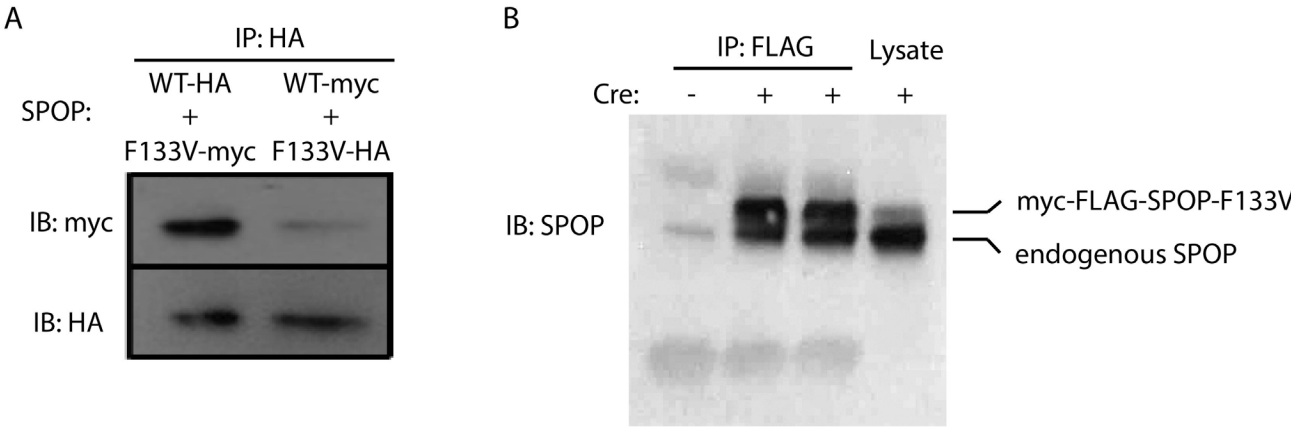

Supplement: supp [file elife_poa_e09207_Figure_2_figure_supplement_2.pdf › elife_poa_e09207_Figure_2_figure_supplement_2.pdf]

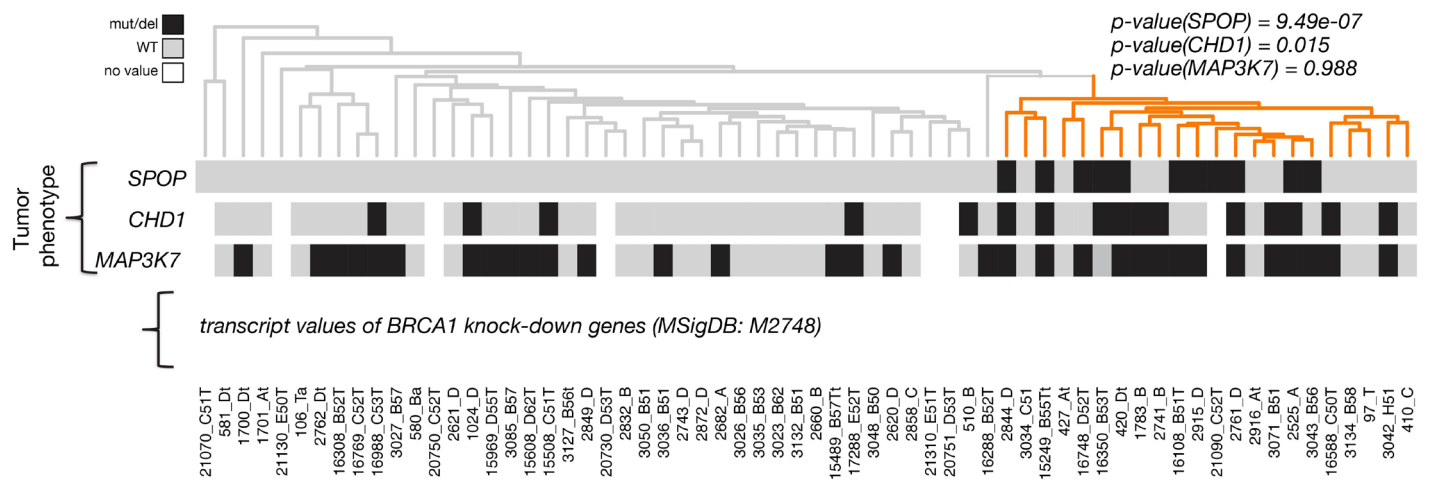

Supplement: supp [file elife_poa_e09207_Figure_2_figure_supplement_3.pdf › elife_poa_e09207_Figure_2_figure_supplement_3.pdf]

A

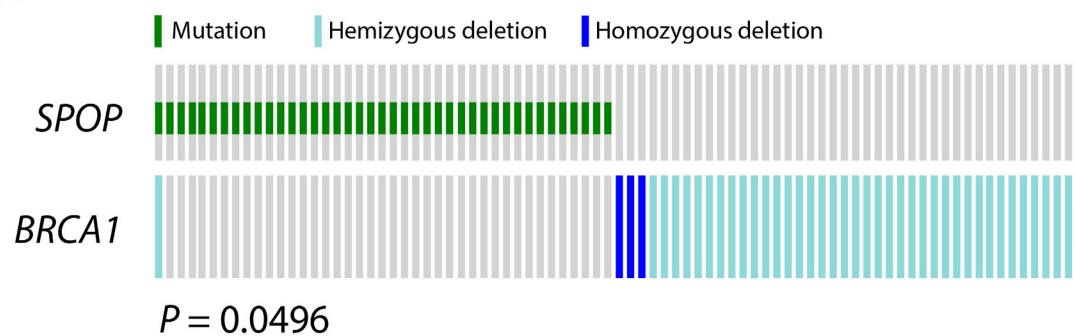

B

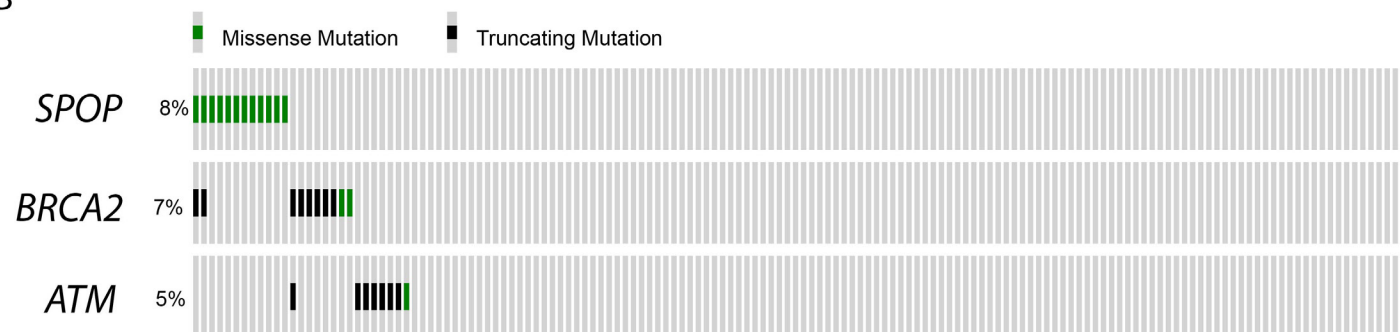

Supplement: supp [file elife_poa_e09207_Figure_2_figure_supplement_4.pdf › elife_poa_e09207_Figure_2_figure_supplement_4.pdf]

**Figure 3- figure supplement 1**

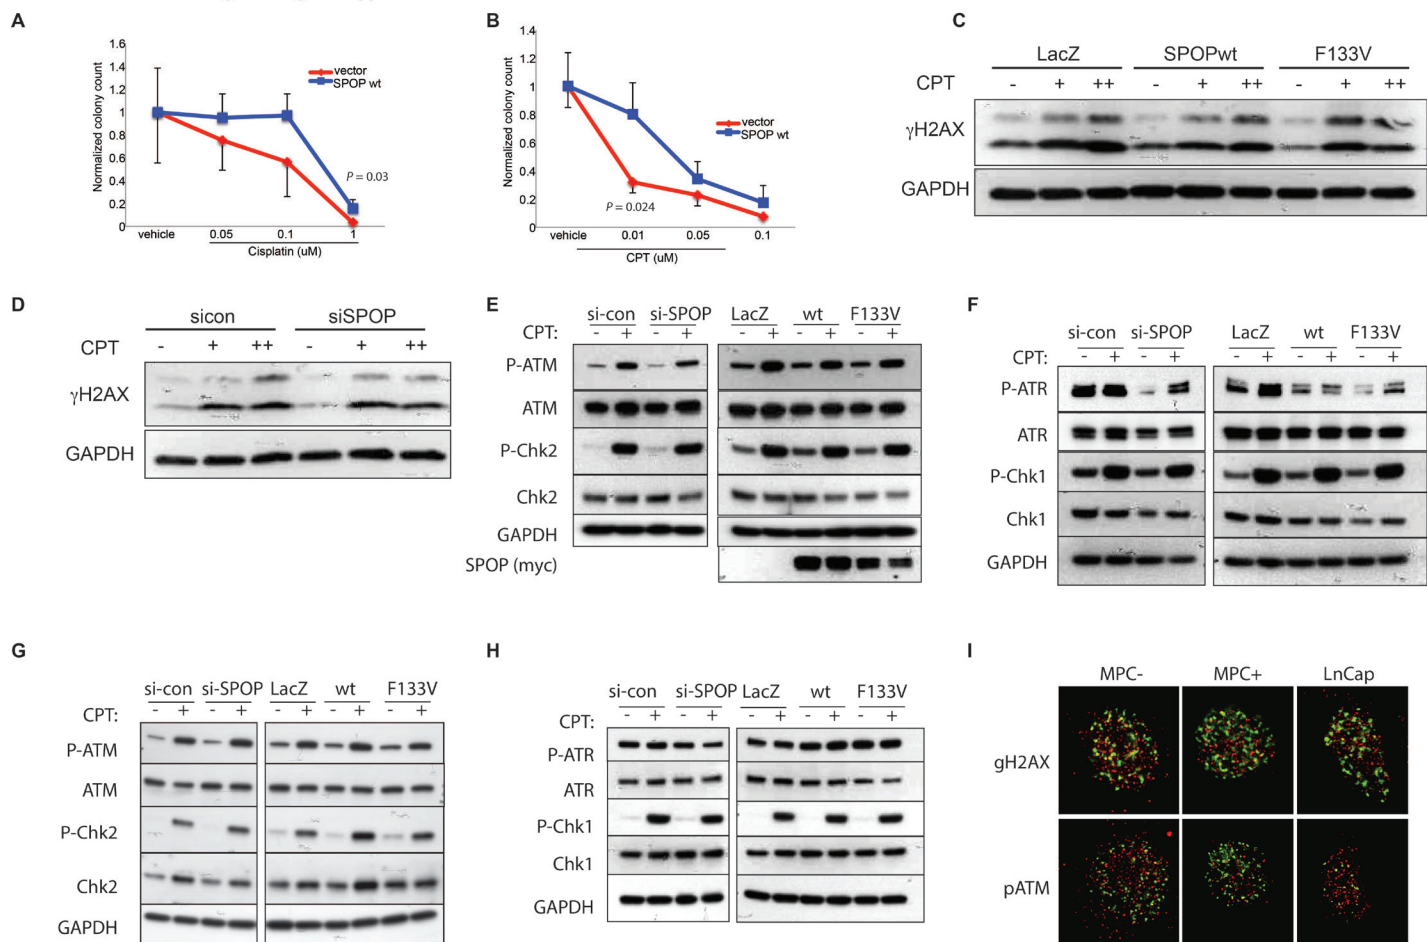

Supplement: supp [file elife_poa_e09207_Figure_3_figure_supplement_1.pdf › elife_poa_e09207_Figure_3_figure_supplement_1.pdf]

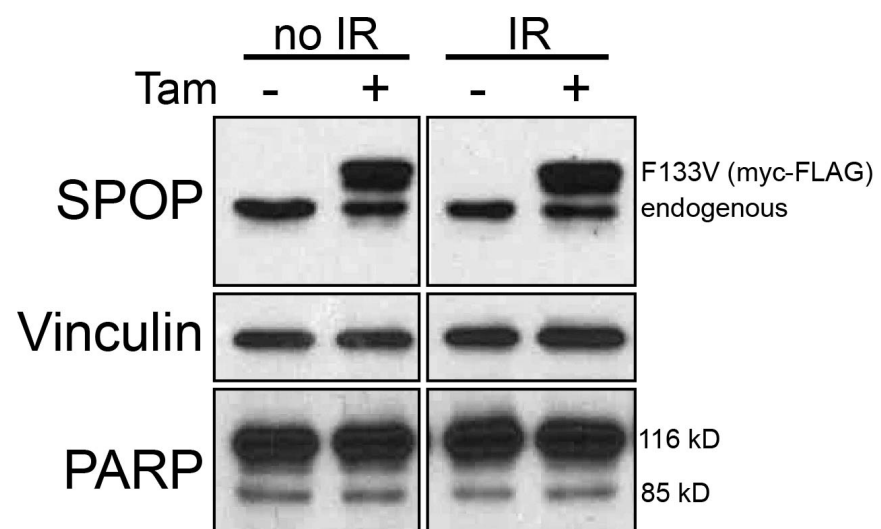

Supplement: supp [file elife_poa_e09207_Figure_3_figure_supplement_2.pdf › elife_poa_e09207_Figure_3_figure_supplement_2.pdf]

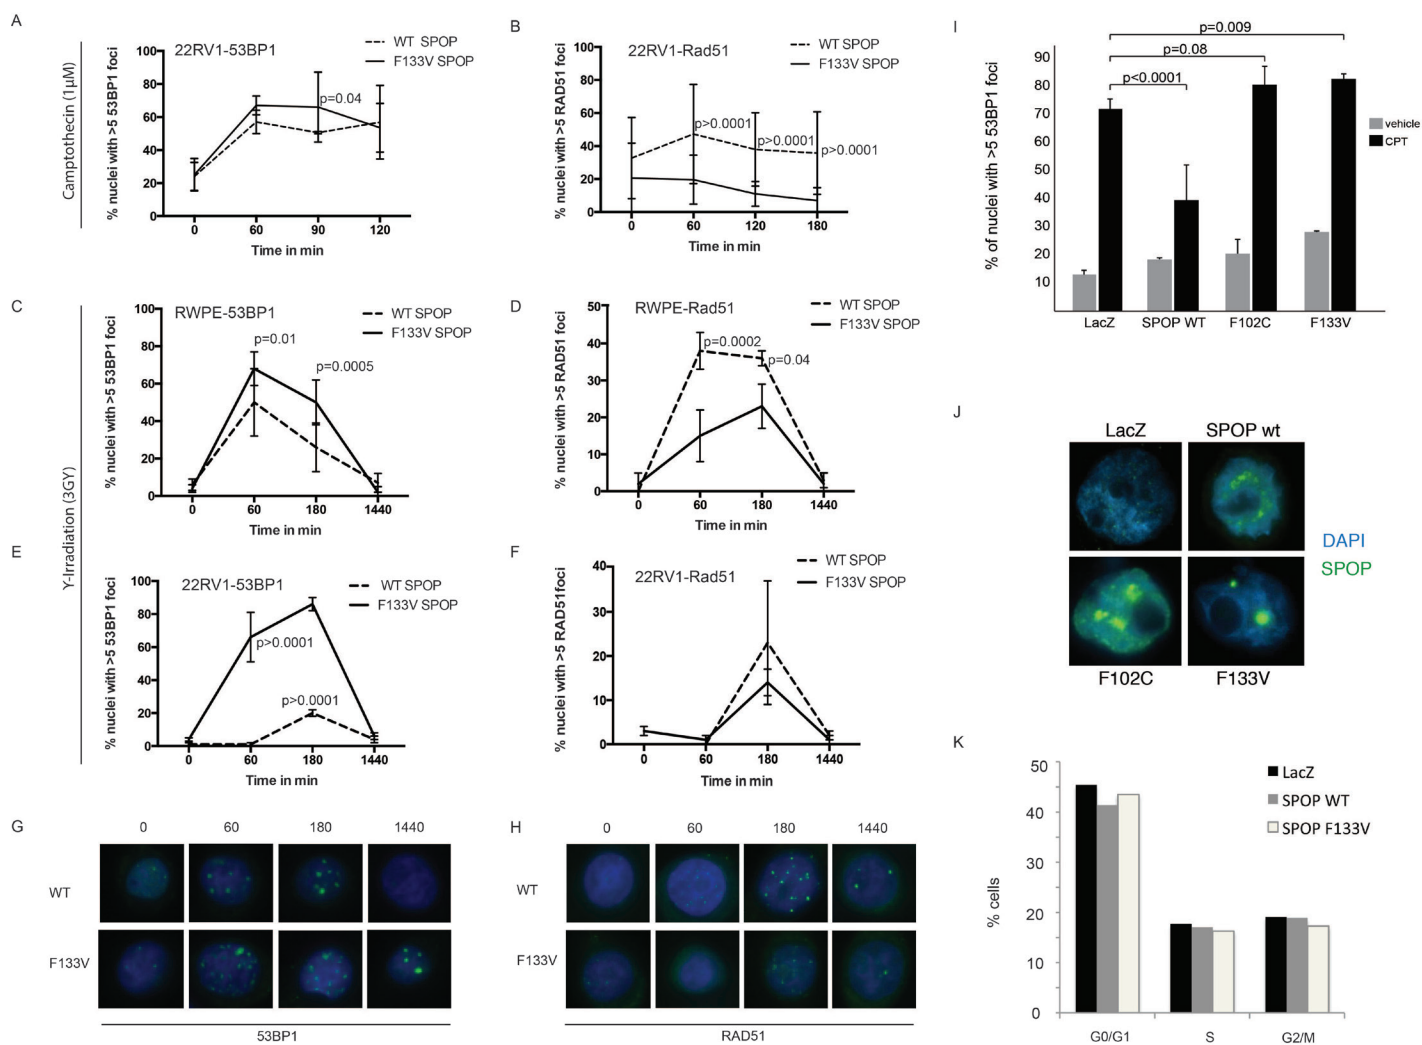

Supplement: supp [file elife_poa_e09207_Figure_3_figure_supplement_3.pdf › elife_poa_e09207_Figure_3_figure_supplement_3.pdf]

Figure 5 - figure supplement 1

A

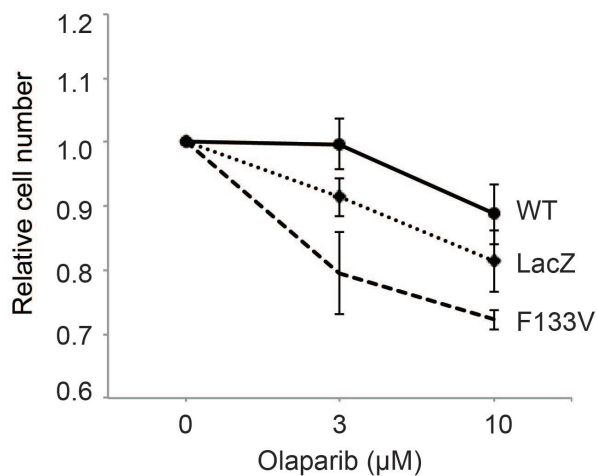

B

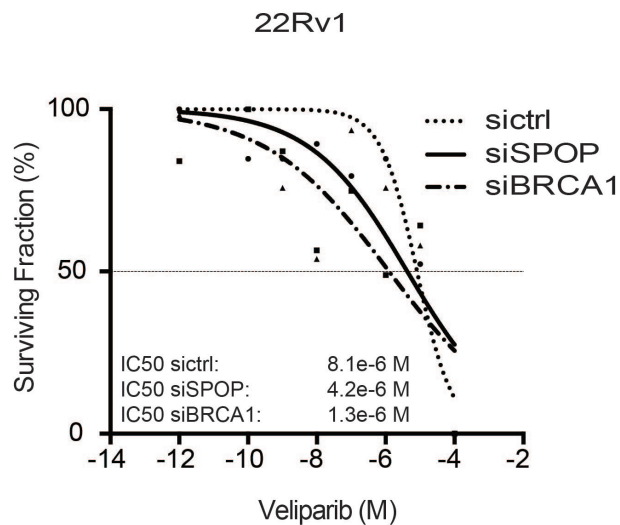

C

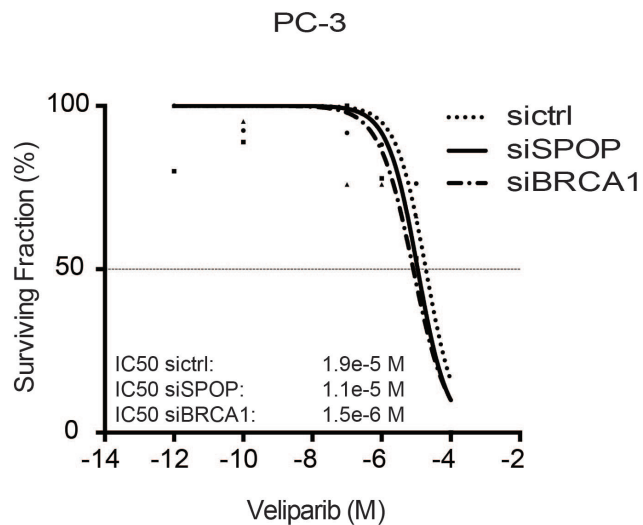

Supplement: supp [file elife_poa_e09207_Figure_5_figure_supplement_1.pdf › elife_poa_e09207_Figure_5_figure_supplement_1.pdf]
